# Supplementary material for: Alcohol control policies and socioeconomic inequalities in hazardous alcohol consumption: a 22-year cross-sectional study in a Swiss urban population
Source: PubMed Central journal article supplement — BMJ Open. 2019 May 24;9(5):e028971. doi: 10.1136/bmjopen-2019-028971 (PMC6538024; doi:10.1136/bmjopen-2019-028971), 2019-05-24
Supplement: bmjopen-2019-028971.draft_revisions.pdf [file bmjopen-2019-028971.draft_revisions.pdf]

# BMJ Open

BMJ Open is committed to open peer review. As part of this commitment we make the peer review history of every article we publish publicly available.

When an article is published we post the peer reviewers' comments and the authors' responses online. We also post the versions of the paper that were used during peer review. These are the versions that the peer review comments apply to.

The versions of the paper that follow are the versions that were submitted during the peer review process. They are not the versions of record or the final published versions. They should not be cited or distributed as the published version of this manuscript.

BMJ Open is an open access journal and the full, final, typeset and author-corrected version of record of the manuscript is available on our site with no access controls, subscription charges or pay-per-view fees (<http://bmjopen.bmj.com>).

If you have any questions on BMJ Open's open peer review process please email [info.bmjopen@bmj.com](mailto:info.bmjopen@bmj.com)

# BMJ Open

## Alcohol control policies and socioeconomic inequalities in hazardous alcohol consumption: a 22-year cross-sectional study in a Swiss urban population

|                               |                                                                                                                                                                                                                                                                                                                                                                                                                                                                                                                                                                                                                                                                                                                                                                                                                                                                                                                                                                                                                                                                          |
|-------------------------------|--------------------------------------------------------------------------------------------------------------------------------------------------------------------------------------------------------------------------------------------------------------------------------------------------------------------------------------------------------------------------------------------------------------------------------------------------------------------------------------------------------------------------------------------------------------------------------------------------------------------------------------------------------------------------------------------------------------------------------------------------------------------------------------------------------------------------------------------------------------------------------------------------------------------------------------------------------------------------------------------------------------------------------------------------------------------------|
| Journal:                      | <i>BMJ Open</i>                                                                                                                                                                                                                                                                                                                                                                                                                                                                                                                                                                                                                                                                                                                                                                                                                                                                                                                                                                                                                                                          |
| Manuscript ID                 | bmjopen-2019-028971                                                                                                                                                                                                                                                                                                                                                                                                                                                                                                                                                                                                                                                                                                                                                                                                                                                                                                                                                                                                                                                      |
| Article Type:                 | Research                                                                                                                                                                                                                                                                                                                                                                                                                                                                                                                                                                                                                                                                                                                                                                                                                                                                                                                                                                                                                                                                 |
| Date Submitted by the Author: | 05-Jan-2019                                                                                                                                                                                                                                                                                                                                                                                                                                                                                                                                                                                                                                                                                                                                                                                                                                                                                                                                                                                                                                                              |
| Complete List of Authors:     | <p>Sandoval, José Luis; Hopitaux Universitaires de Geneve, Department of community primary care and emergency</p> <p>Leão, Teresa; Universidade Nova de Lisboa Escola Nacional de Saude Publica</p> <p>Theler, Jean-Marc; Geneva University Hospitals and Faculty of Medicine, University of Geneva, Unit of Population Epidemiology, Division of Primary Care Medicine, Department of Community Medicine, Primary Care and Emergency Medicine</p> <p>Favrod-Coune, Thierry; Hopitaux Universitaires de Geneve, Addictions Unit, Expert in alcoholology, Department of Community Medicine, Primary Care and Emergency</p> <p>Broers, Barbara; Hopitaux Universitaires de Geneve, Addictions Unit</p> <p>Gaspoz, Jean-Michel; Geneva University Hospitals and School of Medicine, Department of Primary Care, Community and Emergency Medicine</p> <p>Vasques-Vidal, Pedro-Manuel; Lausanne University Hospital, Department of Internal Medicine</p> <p>Guessous, Idris; University Hospitals of Geneva, Department of community medicine, primary care and emergency</p> |
| Keywords:                     | Socioeconomic factors, inequality, hazardous alcohol consumption, alcohol control laws, education, occupation                                                                                                                                                                                                                                                                                                                                                                                                                                                                                                                                                                                                                                                                                                                                                                                                                                                                                                                                                            |
|                               |                                                                                                                                                                                                                                                                                                                                                                                                                                                                                                                                                                                                                                                                                                                                                                                                                                                                                                                                                                                                                                                                          |

SCHOLARONE™  
Manuscripts

1  
2  
3 **Alcohol control policies and socioeconomic inequalities in hazardous**  
4 **alcohol consumption: a 22-year cross-sectional study in a Swiss urban**  
5 **population**  
6  
7  
8  
9

10  
11 **Authors:** José Luis Sandoval<sup>1,2¶</sup>, Teresa Leão<sup>3¶</sup>, Jean-Marc Theler<sup>1</sup>, Thierry Favrod-  
12 Coune<sup>4</sup>, Barbara Broers<sup>4</sup>, Jean-Michel Gaspoz<sup>4</sup>, Pedro Marques-Vidal<sup>5</sup>, Idris  
13 Guessous<sup>1,4\*</sup>  
14  
15  
16

17  
18 **Affiliations**  
19

- 20  
21 1) Unit of Population Epidemiology, Department of Community Medicine, Primary  
22 Care and Emergency Medicine, Geneva University Hospitals, Rue Gabrielle-Perret-  
23 Gentil 4, 1205 Geneva, Switzerland  
24  
25  
26  
27 2) Department of General Internal Medicine, Rehabilitation and Geriatrics, Geneva  
28 University Hospitals, Rue Gabrielle-Perret-Gentil 4, 1205 Geneva, Switzerland  
29  
30  
31  
32 3) Escola Nacional de Saúde Pública, Universidade NOVA de Lisboa, Av. Padre Cruz,  
33 1600-560 Lisbon, Portugal  
34  
35  
36  
37 4) Division of Primary Care Medicine, Department of Community Medicine, Primary Care  
38 and Emergency Medicine, Geneva University Hospitals and Faculty of Medicine,  
39 University of Geneva, Rue Gabrielle-Perret-Gentil 4, 1205 Geneva, Switzerland  
40  
41  
42  
43 5) Department of Medicine, Internal Medicine, Lausanne University Hospital  
44 (CHUV), Rue du Bugnon 46, 1011 Lausanne, Switzerland  
45  
46

47 ¶These authors contributed equally, \*Corresponding author  
48  
49

50 **Correspondence:** Prof Idris Guessous, Unit of Population Epidemiology, Department  
51 of Community Medicine, Primary Care and Emergency Medicine, Geneva University  
52 Hospitals, Rue Gabrielle-Perret-Gentil 4, 1205 Geneva, Switzerland, Tel  
53 0041223055861 Fax 0041223723015, [idris.guessous@hcuge.ch](mailto:idris.guessous@hcuge.ch)  
54  
55  
56  
57  
58

59 **Word count:** abstract 256, main text 3209  
60

## Abstract

### Objective

Harmful use of alcohol represents a large socioeconomic and disease burden, and displays a socioeconomic status (SES) gradient. Several alcohol control laws were devised and implemented, but their equity impact remains undetermined.

We ascertained if a SES gradient in hazardous alcohol consumption exists in Geneva (Switzerland) and assessed the equity impact of the alcohol control laws implemented during the last two decades.

### Design

Cross-sectional survey study

### Setting

We used data from non-abstinent participants, aged 35 to 74 years, from the population-based cross-sectional Bus Santé study (n=16 725), between 1993 and 2014.

### Outcome measures

SES indicators included educational attainment (primary, secondary and tertiary) and occupational level (high, medium and low). We defined four survey periods according to the implemented alcohol control laws, and hazardous alcohol consumption (outcome variable) as >30g/day for men and >20g/day for women.

The slope (SII) and relative (RII) indexes of inequality were used to quantify absolute and relative inequalities, respectively, and were compared between legislative periods.

### Results

Lower educated men had higher frequency of hazardous alcohol (RII=1.87,  $p<0.001$  and SII=0.14,  $p<0.001$ ). Lower educated women had less hazardous consumption (RII=0.76,  $p=0.026$  and SII=-0.04,  $p=0.008$ ). Over time, hazardous alcohol consumption decreased, except in lower educated men.

1  
2  
3 Education-related inequalities were observed in men in all legislative periods and did  
4  
5 not vary between them. Similar results were observed using occupational level as SES  
6  
7 indicator.  
8  
9

## 10 **Conclusions**

11  
12 Population-wide alcohol control laws did not have a positive equity impact on  
13  
14 hazardous alcohol consumption. Targeted interventions to disadvantaged groups may be  
15  
16 needed to address the hazardous alcohol consumption inequality gap.  
17  
18  
19  
20  
21

## 22 **Strengths and limitations of this study**

- 23 • Relatively large cross-sectional study spanning 20 years
- 24 • Use of relative and absolute inequality regression-based measures
- 25 • Equity impact of several alcohol control measures was evaluated
- 26 • No longitudinal data to clearly assess causality
- 27 • Possible confounding by the 2008 economical crisis cannot be excluded.
- 28
- 29
- 30
- 31
- 32
- 33
- 34
- 35
- 36
- 37
- 38

39 **Keywords:** Socioeconomic factors, inequality, hazardous alcohol consumption, alcohol  
40 control laws, education, occupation.  
41  
42  
43  
44  
45  
46  
47  
48  
49  
50  
51  
52  
53  
54  
55  
56  
57  
58  
59  
60

## 1 - INTRODUCTION

Harmful use of alcohol is responsible for a large social, economic and disease burden. According to the World Health Organization (WHO), harmful use of alcohol is estimated to represent 5.9% of worldwide mortality, accounting for 3.3 million deaths per year. Additionally, the global burden of disease and injury attributed to alcohol represents 5.1% of the total disability-adjusted life years, being in the origin of an excess of 200 injury and disease conditions (Poznyak and Rekke 2014). Both mortality and morbidity related to alcohol consumption have increased over time (Forouzanfar et al. 2015; GBD 2015 Risk Factors Collaborators 2016; GBD 2016 Risk Factors Collaborators 2017).

Considering the high burden of disease attributed to alcohol consumption, several legislative interventions were advocated by the WHO (WHO 2012) and by the Organisation for Economic Co-operation and Development (OECD). Many of these interventions aiming at the reduction of harmful consumption were implemented in several countries and were met with considerable success (Sassi 2015).

As in other harmful behaviours, a social gradient in alcohol consumption was identified, with higher consumption existing in individuals with lower socioeconomic status (SES) (Bloomfield et al. 2006; Kuntsche et al. 2004; Marmot et al. 2012). Also, its effects on health are socially patterned with higher alcohol-related mortality in low educated individuals and manual workers (Mackenbach et al. 2015), and alcohol-related mortality significantly associated with the raise of unemployment rates (Stuckler et al. 2009). Some institutions, as the WHO, have set practical measures to prevent the widening of alcohol-related inequalities and, ideally, to reduce them. Policies such as alcohol taxation and price rising, age limits for purchase and drink-driving, and restriction of alcohol marketing, advertising and promotion, coupled with interventions for heavy

1  
2  
3 drinkers and vulnerable groups are amongst those suggested (Loring 2014). However,  
4 the impact of these policies on SES inequalities in alcohol consumption remains to be  
5 determined and existing studies mainly focus on the equity impact of taxation policies  
6 (Holmes et al. 2014; Meier et al. 2016; Staras et al. 2014).  
7  
8  
9  
10  
11  
12

13 In Geneva (Switzerland), several alcohol control laws were implemented during the last  
14 two decades (Dumont et al. 2017). In 2000, an alcohol advertising ban was introduced,  
15 while in 2004 there was a three-fold increase in prices of alcopop beverages (e.g.  
16 premixed drinks), a decrease in the alcohol driving limit, an off-premise sale  
17 interdiction between 9pm and 7am, and an alcohol sale interdiction in video stores and  
18 gas stations. Smoking bans were suggested to reduce alcohol demand (Kasza et al.  
19 2012; Picone et al. 2004), and such a ban was implemented in Geneva in 2009. A recent  
20 study (Dumont et al. 2017) showed a decrease in overall alcohol consumption and in  
21 hazardous drinking, in men and women in Geneva between 1993 and 2014,  
22 independently of policy changes. Still, differential impact according to SES was not  
23 assessed.  
24  
25  
26  
27  
28  
29  
30  
31  
32  
33  
34  
35  
36  
37  
38

39 In this study we aim, first, to determine if a SES gradient in hazardous alcohol  
40 consumption exists in the adult population of Geneva and, second, to assess the impact  
41 of the implemented alcohol control policies on this gradient, if any.  
42  
43  
44  
45  
46

## 47 **2 - METHODS**

### 48 **2.1 - Participants**

49 We used data from the Bus Santé study, a continuing population-based study in the  
50 State of Geneva (population of approximately 490 000 inhabitants in 2016) monitoring  
51 health and associated risk factors. As previously described (Guessous et al. 2012),  
52 independent samples of residents were subjected to annual health examination surveys  
53  
54  
55  
56  
57  
58  
59  
60

1  
2  
3 since 1993. A resident list provided by the local authorities was used to select  
4 participants which were aged 35-74 years until 2011 and 20-74 years afterwards.  
5  
6 Gender and 10-year age strata were used for stratified random sampling. Each  
7  
8 participant was invited to a Bus Santé study unit where trained collaborators would  
9  
10 administer the questionnaires. One of the three study units was a mobile unit visiting  
11  
12 different areas of the Geneva Canton while the other two were based at the Geneva  
13  
14 University Hospitals.  
15  
16  
17

18  
19 Individuals who did not respond to the invitation were telephoned up to seven times at  
20  
21 different days of the week and times of the day. If contact was not established, two extra  
22  
23 invitations were mailed. When participants were unreachable they were considered as  
24  
25 non-responders and replaced.  
26  
27

28  
29 Participation rate varied from 50.8% for 2010-2014 to 60.1% for the 1996-2003 period.  
30  
31 Participant recruitment decreased during the period between 2005 and 2008 due to a  
32  
33 simultaneous study taking place with shared logistical resources but not focusing on the  
34  
35 same population.  
36  
37

38  
39 The Bus Santé study was conducted in accordance with the principles of the Declaration  
40  
41 of Helsinki, was granted approval by the Institute of Ethics Committee of the University  
42  
43 of Geneva, and obtained written consent from all participants.  
44

## 45 **2.2 - Exclusion criteria**

46  
47 We included participants with ages between 35 and 74 years, the age group consistently  
48  
49 recruited during the entirety of the Bus Santé study. We excluded abstinent participants  
50  
51 (n=3059, 15.2%) and those with missing data on educational attainment (n=368, 2.2%),  
52  
53 assumed to be missing completely at random. For occupational level analysis,  
54  
55 participants that were not working (unemployed n=789, 4.7%; retired n=2753, 16.4%  
56  
57  
58  
59  
60



1  
2  
3 and housewives/househusbands n=1635, 9.7%) or with missing for this variable (n=257,  
4  
5 1.5%) were also excluded.  
6

### 7 8 **2.3 - Outcome variable**

9  
10 The main outcome variable was hazardous alcohol consumption (>30g/day for men and  
11 >20g/day for women) established based on data from total daily alcohol intake in g/day  
12  
13 and according to the International Alliance for Responsible Drinking guidelines  
14  
15 defining hazardous consumption in Switzerland at the time of the study  
16  
17 (<http://www.iard.org/policy-tables/drinking-guidelines-general-population/>). Total daily  
18  
19 alcohol intake was determined using a validated food frequency questionnaire (FFQ), as  
20  
21 previously described (Dumont et al. 2017), taking into account consumption frequency,  
22  
23 type of alcoholic beverage (wine, champagne, beer, aperitifs such as anisette or martini,  
24  
25 and spirits like liqueur, brandy or whisky) and average serving size compared to a 10g  
26  
27 alcohol standard for each beverage (similar, bigger or smaller). The same FFQ was used  
28  
29 throughout the totality of the study, with the resulting data having incorporated large  
30  
31 international consortia (Micha et al. 2014).  
32  
33  
34  
35  
36

### 37 38 **2.4 - Covariates**

39  
40 We created a categorical variable identifying participants who were surveyed during  
41  
42 periods that differed in the implemented alcohol control laws: period 1 (before  
43  
44 20/10/2000, baseline), period 2 (from 20/10/2000 to 01/02/2004 - introduction of  
45  
46 advertising ban), period 3 (from 02/02/2004 to 31/10/2009 - 300% increase in alcopop  
47  
48 price, decrease of legal alcohol driving limit, off-premise sale interdiction of alcoholic  
49  
50 beverages from 9pm to 7am and gas stations and video stores are no longer allowed to  
51  
52 sell alcohol) and period 4 (from 01/11/2009 onwards – implementation of a public  
53  
54 smoking ban).  
55  
56  
57  
58  
59  
60

1  
2  
3 As in Huisman et al (Huisman et al. 2005) we considered educational attainment in 3  
4 levels: i) Primary - no end of school certification (“Maturité”) or no professional  
5 apprenticeship, ii) Secondary - obtaining “Maturité” or professional apprenticeship and  
6  
7  
8  
9  
10  
11  
12  
13  
14  
15  
16  
17  
18  
19  
20  
21  
22  
23  
24  
25  
26  
27  
28  
29  
30  
31  
32  
33  
34  
35  
36  
37  
38  
39  
40  
41  
42  
43  
44  
45  
46  
47  
48  
49  
50  
51  
52  
53  
54  
55  
56  
57  
58  
59  
60

Current occupation was categorised into three categories according to the British Registrar General’s Scale (Leete and Fox 1977): high (professional and intermediate professions), medium (non-manual occupations) and low (manual or lower occupations).

Age was used as a continuous variable; smoking status was classified into never smokers, current smokers and ex-smokers, and nationality as Swiss or other.

## 2.5 - Statistical analysis

Continuous variables are presented as mean  $\pm$  standard deviation (SD) while categorical ones as absolute and relative frequencies.

Chi-squared test of independence and one-way ANOVA were used to assess the significance of group differences in categorical and continuous variables, respectively.

All analyses were stratified by gender. Outcome proportions in different survey years, as displayed in Figure 1 and Supplementary Figure 2, were age-adjusted using the age distribution of the Swiss population in 2014 (<https://www.bfs.admin.ch/bfs/en/home/statistics/population.html>).

Time-series analyses were performed (overall and stratified by educational attainment or occupational level), using adjusted linear (for total consumption) or binomial (for hazardous consumption) regression models. Coefficients for the calendar year variable are reported.

Poisson regression models were used to test the association between exposure (educational attainment and occupational level) and outcome variables (hazardous

1  
2  
3 alcohol consumption and total daily alcohol consumption), and to estimate prevalence  
4 ratios (PR). Besides age, nationality and smoking status, models were also adjusted for  
5 survey date in calendar years to take secular trends into account (Agaku et al. 2014;  
6  
7  
8  
9  
10 Becker et al. 1994; Regidor et al. 2015).

11  
12 We used the STATA package *RIIGEN* (Kroll 2013; Mackenbach and Kunst 1997) to  
13  
14 calculate the slope index of inequality (SII) and the relative index of inequality (RII)  
15  
16 which quantify absolute and relative differences between SES-defined strata,  
17  
18 respectively.  
19

20  
21 These regression-based indexes describe differences between the SES extremes taking  
22  
23 into account the intermediate categories (Mackenbach and Kunst 1997). For instance,  
24  
25 RII=1.3 represents an added 30% outcome prevalence in the lowest SES group  
26  
27 compared to the highest, similar to a prevalence ratio. SII, an impact measure, indicates  
28  
29 the absolute difference in outcome prevalence between lowest and highest SES groups.  
30  
31 For example, SII=0.3 indicates 30 more individuals with the outcome per 100  
32  
33 individuals in the lowest SES group compared to the highest one. When used with  
34  
35 continuous variables, as total alcohol consumption, SII=4 would indicate an excess  
36  
37 consumption of 4g/day in the lowest SES group when compared to the highest.  
38  
39

40  
41 Both indexes were calculated for each of the four periods and compared between them  
42  
43 using pairwise Wald tests.  
44  
45

46  
47 Sensitivity analyses of the educational attainment and the occupational level-based  
48  
49 models were performed through adjustment for a second SES indicator (occupational  
50  
51 level or educational attainment, respectively). Adjustment of educational attainment  
52  
53 model by occupational level included non-working individuals: retired, unemployed and  
54  
55 housewives/househusbands. Reciprocal adjustment did not change the overall trends  
56  
57  
58  
59  
60

(sensitivity analyses can be found in Supplementary Tables 5-7). Data were analysed using STATA 13.1 and R 3.2.2.

### 3 - RESULTS

#### 3.1 - Characteristics of participants

The participant characteristics stratified by gender and educational attainment can be found in Table 1. For education-based analyses we included 16 725 participants of which 18.0% had primary education, 45.0% secondary education and 37.0% tertiary education. The mean daily consumption of alcohol was  $15.9 \pm 18.9$  g/day and 18.2% were found to have hazardous alcohol consumption. When stratified by gender and educational attainment, higher educated participants of both genders were younger, more often Swiss and less probably current smokers. Furthermore, daily alcohol consumption and proportion of participants with hazardous alcohol consumption were higher in lower educated men, while no differences could be observed in women.

For the occupational level analysis, we included 11 659 working participants and their characteristics are reported in Supplementary Table 1. Similarly to the educational attainment stratification, lower alcohol consumption and lower proportion of consumption at risk were found in men with high occupational level and no differences were observed amongst women.

#### 3.2 - Time trends of hazardous alcohol consumption

Alcohol consumption (Supplementary Figure 1a) and the proportion of drinkers with hazardous consumption (Supplementary Figure 1b) have decreased in both genders between 1993 and 2014 (Supplementary Table 2). Yet, when time trends were stratified by educational attainment, we observed that the decrease has not occurred similarly across all educational attainment-related groups, since men with primary education did not display a reduction in hazardous alcohol consumption like their counterparts with

1  
2  
3 secondary and tertiary education (Figure 1a). However, when using occupational level  
4 as an SES indicator, after an initial increase in hazardous consumption in participants  
5 with low occupational level, a decrease could be observed in later periods (Figure 1b).  
6  
7 To test if the observed time trends were not due to differences in participant  
8 characteristics other than educational attainment and occupational level, data were fitted  
9 into multivariable binomial models to obtain adjusted time trends (Supplementary Table  
10 2). We identified negative adjusted time trends for both outcomes, in both genders  
11 ( $\beta_{\text{hazardous consumption in men}} = -0.04 [-0.04; -0.03]$   $p < 0.001$ ,  $\beta_{\text{hazardous consumption in women}} = -0.04 [-$   
12  $0.05; -0.03]$   $p < 0.001$ ). As suggested by Figure 1a and Supplementary Table 2, adjusted  
13 time trend analysis stratified by educational attainment showed that hazardous  
14 consumption did not change among men with primary education ( $\beta_{\text{primary}} = -0.00 [-$   
15  $0.02; 0.02]$   $p = 0.75$ ), while it decreased among men with secondary or tertiary education  
16 ( $\beta_{\text{secondary}} = -0.04 [-0.06; -0.03]$   $p < 0.001$ ;  $\beta_{\text{tertiary}} = -0.05 [-0.06; -0.03]$   $p < 0.001$ ). For women,  
17 the time trends were all negative. Analyses stratified by occupational level revealed a  
18 harmonious decrease in hazardous alcohol consumption in all levels and for both  
19 genders (Supplementary Table 2).

20  
21  
22 Similar results were observed when total daily alcohol intake was used as outcome  
23 variable (Supplementary Figure 1a-b, Supplementary Table 2).

### 24 25 26 **3.3 - Association between educational attainment, occupational level and 27 hazardous alcohol consumption**

28  
29 We observed more hazardous consumption in lower educated men ( $PR_{\text{primary vs}}^{\text{tertiary}} = 1.58 [1.39; 1.80]$   $p < 0.001$ ,  $PR_{\text{secondary vs tertiary}} = 1.32 [1.18; 1.47]$   $p < 0.001$ ) with this  
30 being reflected in the relative and absolute indexes of inequality ( $RII = 1.87 [1.57; 2.22]$   
31  $p < 0.001$  and  $SII = 0.14 [0.11; 0.17]$   $p < 0.001$ , respectively) (Table 2). On the other hand,  
32  
33  
34  
35  
36  
37  
38  
39  
40  
41  
42  
43  
44  
45  
46  
47  
48  
49  
50  
51  
52  
53  
54  
55  
56  
57  
58  
59  
60

1  
2  
3 lower education was associated with less hazardous consumption in women (RII=0.76  
4 [0.60;0.97]  $p=0.026$  and SII=-0.04 [-0.07;-0.01]  $p=0.008$ ) (Table 2).

7 An occupational level-related gradient was observed in men, those with lower  
8 occupational level having a higher proportion of hazardous consumption (RII=1.68  
9 [1.38;2.06]  $p<0.001$  and SII=0.11 [0.07;0.15]  $p<0.001$ ) (Table 2). Conversely, no such  
10 gradient was found in women (Table 2).

13 Similar findings were obtained for total daily alcohol intake, except for women with  
14 lower occupational level which displayed lower daily alcohol consumption  
15 (Supplementary Table 3).

### 24 **3.4 - Alcohol laws, alcohol consumption, and SES inequalities**

25 In men, we identified absolute and education-related inequalities in hazardous alcohol  
26 consumption in all periods and favouring the most educated (Figure 2a, Supplementary  
27 Table 4). No differences between periods were observed ( $p>0.05$ ) (Figure 2a). In  
28 women, no education-related inequalities were observed during the various legislative  
29 periods (Figure 2a, Supplementary Table 4).

30 Occupational level-related inequalities in men were also observed in absolute and  
31 relative terms, and increased between period 1 and 2 ( $p<0.05$ ), remaining constant  
32 thereafter (Figure 2b, Supplementary Table 4). In women, inequalities in favour of those  
33 with lower occupational level were only observed in period 2, with an increase being  
34 observed between period 1 and 2 ( $p<0.05$ ) (Figure 2b, Supplementary Table 4).

35 Similar results were obtained concerning daily alcohol intake (Supplementary Figure  
36 3a-b, Supplementary Table 4).

#### 4 - DISCUSSION

We identified a social gradient in alcohol drinking patterns among men, with lower SES being associated with higher proportion of hazardous consumption and higher total daily alcohol consumption. In women, a less pronounced inverse gradient was observed with higher SES being associated with higher hazardous consumption and higher total daily consumption.

These patterns were also found in other studies: low education and manual occupation males tend to have higher prevalence of alcohol consumption, contrarily to women (Bloomfield et al. 2006; Sassi 2015).

We observed a discrepancy between time trends when educational attainment or occupational level were used as SES indicators. Sensitivity analyses showed that this was not due to the educational attainment-based analysis including non-working participants. SES indicators such as education and occupational level often display low to moderate correlations and cannot be used interchangeably (Geyer et al. 2006; Muller 2002; Sandoval et al. 2017). Furthermore, each indicator may be related to different causal mechanisms and can be differentially associated with a specific health-related outcome (Geyer et al. 2006). It is thus possible that lower education has a wider impact on other SES-related determinants of persistent alcohol consumption than occupation, justifying the observed discrepancies in alcohol consumption trends.

Differently from previous studies, we studied the evolution of alcohol drinking patterns during a 22-year period. Though hazardous consumption decreased in both genders, inequalities in alcohol consumption remained stable among men. No specific inequality patterns were identified for the periods with different legislative alcohol control measures (advertising ban, three-fold increase in alcopop price, decrease of legal

1  
2  
3 alcohol driving limit, and ban of off-premise sale of alcoholic beverages from 9pm to  
4  
5 7am and at gas stations and video stores). The lack of equity impact of these measures  
6  
7 can potentially be explained in light of the recommendations and reports by the WHO  
8  
9 (Loring 2014) and OECD (Sassi 2015). Though these institutions recommend raising  
10  
11 the taxes of all alcoholic products, the OECD described Switzerland as having mild  
12  
13 alcohol taxation with some of lowest taxes on beer and wine (Sassi 2015). Moreover,  
14  
15 the raise on the tax of an alcoholic product does not directly reduce consumption, since  
16  
17 it does not guarantee an increase in the final price of the product, or a relevant price  
18  
19 increase considering the populations' purchasing power. A recent report pointed out that  
20  
21 price increases due to taxation were regressive measures in nature, with a bigger  
22  
23 financial burden on individuals with low SES, thus with a potential positive equity  
24  
25 impact (Sassi et al. 2018). However, this study was mainly based on data from  
26  
27 low/middle income countries where the majority of consumers belong to high SES  
28  
29 strata. Lack of data concerning high income countries precluded the same analysis in  
30  
31 this context. Our results suggest that the increase in tax on alcopop beverages did not  
32  
33 have a positive equity impact in hazardous alcohol consumption and further increases in  
34  
35 taxation of other alcoholic products are probably needed. Also, easy circulation between  
36  
37 neighbouring regions and countries may have allowed smuggling of beverages with a  
38  
39 lower price. This is particularly relevant for regions like Geneva due to its proximity to  
40  
41 the France-Switzerland border. Finally, and even though our study covered a relatively  
42  
43 long period, legislative measures may have a delayed impact in time, not observable in  
44  
45 the time span of this study.

#### 4.1 - Strengths

46  
47 We analysed a population-based sample of participants from a single region spanning a  
48  
49 22-year period. This relatively homogeneous sample allowed us not only to measure  
50  
51  
52  
53  
54  
55  
56  
57  
58  
59  
60



1  
2  
3 alcohol consumption and its inequalities in this population, but also to follow them in  
4  
5 different periods according to which alcohol control laws were implemented. We used  
6  
7 two SES indicators (educational attainment and occupational level) and the lack of  
8  
9 effect of alcohol control measures on inequalities based on both indicators further  
10  
11 increases the robustness of our findings. Furthermore, we measured inequalities and  
12  
13 their trends complementing the relative with absolute measures in order to determine the  
14  
15 impact that interventions to reduce inequalities could have had on the outcomes  
16  
17 (Charafeddine et al. 2013; Mackenbach and Kunst 1997).  
18  
19  
20  
21

#### 22 **4.2 - Limitations**

23  
24 Our study has several limitations. First, it was based on self-reported repeated cross-  
25  
26 sectional data instead of longitudinal, not allowing the follow-up of alcohol  
27  
28 consumption and its inequalities at the individual level. Second, participation rate, as in  
29  
30 another cross-sectional survey studies, ranged between 51% and 60%, and, accordingly,  
31  
32 selection bias cannot be excluded. Third, strong enforcement and coordinated multi-  
33  
34 level approach are capital for an effective implementation of alcohol control laws.  
35  
36 Unfortunately, we could not evaluate the degree of law enforcement as no data on  
37  
38 measure adoption were available, and we were not able to control for the price trends of  
39  
40 the alcoholic products. Moreover, the time span of this study included the 2008  
41  
42 economic crisis, which may have impacted on alcohol consumption and its inequalities,  
43  
44 as noted by Stuckler et al (Stuckler et al. 2009). Finally, besides confounding by other  
45  
46 unrecorded factors, our study is based on a single region of a high income country,  
47  
48 probably limiting the generalisability of the findings to settings that differ greatly from  
49  
50 Geneva.  
51  
52  
53  
54  
55  
56  
57  
58  
59  
60

## 5 - CONCLUSION

In the adult population of Geneva, SES inequalities in hazardous alcohol consumption were identified. The successive anti-alcohol legislations implemented in the last 20 years were unable to reduce them. To close the inequality gap in this harmful behaviour in settings similar to Geneva, evaluating the equity impact of legislative interventions and using adjuvant targeted measures could be of great importance.

**Funding:** The Bus Santé study is funded by the General Directorate of Health, Canton of Geneva, Switzerland and the Geneva University Hospitals.

**Ethics approval:** Institute of Ethics Committee of the University of Geneva. The study complies with the ethical standards established by the Declaration of Helsinki and informed consent was obtained from all participants.

**Author contributions:** José Luis Sandoval and Teresa Leão: conceptualisation, analysis and interpretation of results, manuscript writing and revision. Jean-Marc Theler, Thierry Favrod-Coune, Barbara Broers, Jean-Michel Gaspoz, Pedro Marques Vidal: data collection, interpretation of results, manuscript reviewing and final editing the final manuscript. Idris Guessous: conceptualisation, data collection, interpretation of results, manuscript writing and revision.

**Conflict of interest:** no conflict declared.

**Acknowledgments:** the authors are grateful to the Bus Santé study participants whose data has made this study possible.

**Data sharing statement:** please contact the corresponding author for the dataset and statistical code

## REFERENCES

- 1  
2  
3  
4  
5  
6 Agaku, I. T., B. A. King, et al. (2014). "Current cigarette smoking among adults -  
7 United States, 2005-2012." MMWR Morb Mortal Wkly Rep **63**(2): 29-34.
- 8 Becker, G. S., M. Grossman, et al. (1994). "An empirical analysis of cigarette  
9 addiction." American Economic Review **84**: 396-418.
- 10 Bloomfield, K., U. Grittner, et al. (2006). "Social inequalities in alcohol consumption  
11 and alcohol-related problems in the study countries of the EU concerted action  
12 'Gender, Culture and Alcohol Problems: a Multi-national Study'." Alcohol  
13 Alcohol Suppl **41**(1): i26-36.
- 14 Charafeddine, R., S. Demarest, et al. (2013). "Using multiple measures of inequalities to  
15 study the time trends in social inequalities in smoking." Eur J Public Health  
16 **23**(4): 546-551.
- 17 Dumont, S., P. Marques-Vidal, et al. (2017). "Alcohol policy changes and 22-year  
18 trends in individual alcohol consumption in a Swiss adult population: a 1993-  
19 2014 cross-sectional population-based study." BMJ Open **7**(3): e014828.
- 20 Forouzanfar, M. H., L. Alexander, et al. (2015). "Global, regional, and national  
21 comparative risk assessment of 79 behavioural, environmental and occupational,  
22 and metabolic risks or clusters of risks in 188 countries, 1990-2013: a systematic  
23 analysis for the Global Burden of Disease Study 2013." Lancet **386**(10010):  
24 2287-2323.
- 25 GBD 2015 Risk Factors Collaborators (2016). "Global, regional, and national  
26 comparative risk assessment of 79 behavioural, environmental and occupational,  
27 and metabolic risks or clusters of risks, 1990-2015: a systematic analysis for the  
28 Global Burden of Disease Study 2015." Lancet **388**(10053): 1659-1724.
- 29 GBD 2016 Risk Factors Collaborators (2017). "Global, regional, and national  
30 comparative risk assessment of 84 behavioural, environmental and occupational,  
31 and metabolic risks or clusters of risks, 1990-2016: a systematic analysis for the  
32 Global Burden of Disease Study 2016." Lancet **390**(10100): 1345-1422.
- 33 Geyer, S., O. Hemstrom, et al. (2006). "Education, income, and occupational class  
34 cannot be used interchangeably in social epidemiology. Empirical evidence  
35 against a common practice." J Epidemiol Community Health **60**(9): 804-810.
- 36 Guessous, I., M. Bochud, et al. (2012). "1999-2009 Trends in prevalence, unawareness,  
37 treatment and control of hypertension in Geneva, Switzerland." PLoS One **7**(6):  
38 e39877.
- 39 Holmes, J., Y. Meng, et al. (2014). "Effects of minimum unit pricing for alcohol on  
40 different income and socioeconomic groups: a modelling study." Lancet  
41 **383**(9929): 1655-1664.
- 42 Huisman, M., A. E. Kunst, et al. (2005). "Educational inequalities in smoking among  
43 men and women aged 16 years and older in 11 European countries." Tob  
44 Control **14**(2): 106-113.
- 45 Kasza, K. A., S. A. McKee, et al. (2012). "Smoke-free bar policies and smokers' alcohol  
46 consumption: findings from the International Tobacco Control Four Country  
47 Survey." Drug Alcohol Depend **126**(1-2): 240-245.
- 48 Kroll, L. E. (2013). "RIIGEN: Stata module to generate Variables to Compute the  
49 Relative Index of Inequality. Boston College Department of Economics."
- 50 Kuntsche, E., J. Rehm, et al. (2004). "Characteristics of binge drinkers in Europe." Soc  
51 Sci Med **59**(1): 113-127.
- 52 Leete, R. and J. Fox (1977). "Registrar Generals social classes: origins and uses."  
53 Population trends(8): 1-7.
- 54  
55  
56  
57  
58  
59  
60

- 1  
2  
3 Loring, B. (2014). *Alcohol and Inequities: Guidance for Addressing Inequities in*  
4 *Alcohol-Related Harm* Copenhagen, Denmark, WHO.
- 5 Mackenbach, J. P., I. Kulhanova, et al. (2015). "Inequalities in Alcohol-Related  
6 Mortality in 17 European Countries: A Retrospective Analysis of Mortality  
7 Registers." *PLoS Med* **12**(12): e1001909.
- 8 Mackenbach, J. P. and A. E. Kunst (1997). "Measuring the magnitude of socio-  
9 economic inequalities in health: an overview of available measures illustrated  
10 with two examples from Europe." *Soc Sci Med* **44**(6): 757-771.
- 11 Marmot, M., J. Allen, et al. (2012). "WHO European review of social determinants of  
12 health and the health divide." *Lancet* **380**(9846): 1011-1029.
- 13 Meier, P. S., J. Holmes, et al. (2016). "Estimated Effects of Different Alcohol Taxation  
14 and Price Policies on Health Inequalities: A Mathematical Modelling Study."  
15 *PLoS Med* **13**(2): e1001963.
- 16 Micha, R., S. Khatibzadeh, et al. (2014). "Global, regional, and national consumption  
17 levels of dietary fats and oils in 1990 and 2010: a systematic analysis including  
18 266 country-specific nutrition surveys." *BMJ* **348**: g2272.
- 19 Muller, A. (2002). "Education, income inequality, and mortality: a multiple regression  
20 analysis." *BMJ* **324**(7328): 23-25.
- 21 Picone, G. A., F. Sloan, et al. (2004). "The effect of the tobacco settlement and smoking  
22 bans on alcohol consumption." *Health Econ* **13**(10): 1063-1080.
- 23 Poznyak, V. and D. Rekve, Eds. (2014). *Global status report on alcohol and health,*  
24 *2014.* Geneva, Switzerland, World Health Organization - Management of  
25 Substance Abuse Unit.
- 26 Regidor, E., C. Pascual, et al. (2015). "Impact of tobacco prices and smoke-free policy  
27 on smoking cessation, by gender and educational group: Spain, 1993-2012." *Int*  
28 *J Drug Policy* **26**(12): 1215-1221.
- 29 Sandoval, J. L., J. M. Theler, et al. (2017). "Introduction of an organised programme  
30 and social inequalities in mammography screening: A 22-year population-based  
31 study in Geneva, Switzerland." *Prev Med* **103**: 49-55.
- 32 Sassi, F., Ed. (2015). *Tackling Harmful Alcohol Use*, OECD Publishing.
- 33 Sassi, F., A. Belloni, et al. (2018). "Equity impacts of price policies to promote healthy  
34 behaviours." *Lancet* **391**(10134): 2059-2070.
- 35 Staras, S. A., M. D. Livingston, et al. (2014). "Heterogeneous population effects of an  
36 alcohol excise tax increase on sexually transmitted infections morbidity."  
37 *Addiction* **109**(6): 904-912.
- 38 Stuckler, D., S. Basu, et al. (2009). "The public health effect of economic crises and  
39 alternative policy responses in Europe: an empirical analysis." *Lancet*  
40 **374**(9686): 315-323.
- 41 WHO, Ed. (2012). *European action plan to reduce the harmful use of alcohol 2012-*  
42 *2020.* Copenhagen, Denmark, World Health Organization - Regional office for  
43 Europe.
- 44  
45  
46  
47  
48  
49  
50  
51  
52  
53  
54  
55  
56  
57  
58  
59  
60

## Figure Legends

**Fig. 1** Age-adjusted proportions of participants with hazardous alcohol consumption stratified by gender and a) educational attainment and b) occupational level.

Footnote: Trends were obtained using locally weighted scatterplot smoothing. Each shaded period represents one of the periods with different alcohol control laws

**Fig. 2** Absolute (SII) and relative (RII) inequalities in hazardous alcohol consumption for men (red) and women (blue) for a) educational attainment and b) occupational level.

Footnote: Estimates and 95% confidence intervals are presented as well as level of significance. Wald test p values comparing indexes between groups are presented when  $<0.05$ .  $p < *0.05$ ,  $**0.01$  and  $***0.001$

**Supplementary fig. 1** Evolution of age-adjusted mean alcohol consumption and percentage of drinkers with hazardous alcohol consumption from 1993 to 2014 for men (red) and women (blue).

Footnote: Trends were obtained using locally weighted scatterplot smoothing. Each shaded period represents one of the periods with different alcohol control laws

**Supplementary fig. 2** Age-adjusted mean daily alcohol consumption alcohol consumption (g/day) stratified by gender and a) educational attainment and b) occupational level

Footnote: Trends were obtained using locally weighted scatterplot smoothing. Each shaded period represents one of the periods with different alcohol control laws

**Supplementary fig. 3** Absolute (SII) inequalities in total daily alcohol consumption for men (red) and women (blue) for a) educational attainment and b) occupational level.

Footnote: Estimates and 95% confidence intervals are presented as well as level of significance. Wald test p values comparing indexes were all  $p > 0.05$ .  $p < *0.05$ ,  $**0.01$  and  $***0.001$

**Table 1 – Participants’ characteristics according to educational attainment and gender (1993-2014, Bus Santé study, State of Geneva, Switzerland)**

|                                                     | Overall       | Men               |                     |                    |         | Women             |                     |                    |         |
|-----------------------------------------------------|---------------|-------------------|---------------------|--------------------|---------|-------------------|---------------------|--------------------|---------|
|                                                     |               | Primary education | Secondary Education | Tertiary education | p-value | Primary education | Secondary Education | Tertiary education | p-value |
| <b>N (%)</b>                                        | 16725 (100%)  | 1257 (14.7%)      | 4119 (48.2%)        | 3173 (37.1%)       |         | 1750 (21.4%)      | 3414 (41.8%)        | 3012 (36.8%)       |         |
| <b>age, mean ± SD</b>                               | 52.1 ± 10.6   | 52.8 ± 10.9       | 52.8 ± 10.7         | 51.0 ± 10.6        | <0.001  | 54.6 ± 10.6       | 52.9 ± 10.4         | 49.8 ± 10.1        | <0.001  |
| <b>Swiss nationality</b>                            |               |                   |                     |                    | <0.001  |                   |                     |                    | <0.001  |
| No                                                  | 4704 (28.1%)  | 690 (54.9%)       | 964 (23.4%)         | 1054 (33.2%)       |         | 561 (32.1%)       | 568 (16.6%)         | 867 (28.8%)        |         |
| Yes                                                 | 12013 (71.9%) | 567 (45.1%)       | 3152 (76.6%)        | 2116 (66.8%)       |         | 1189 (67.9%)      | 2846 (83.4%)        | 2143 (71.2%)       |         |
| <b>Total alcohol consumption (g/day), mean ± SD</b> | 15.9 ± 18.9   | 26.3 ± 24.7       | 22.3 ± 23.2         | 17.8 ± 18.1        | <0.001  | 10.7 ± 13.3       | 10.0 ± 12.7         | 10.2 ± 12.7        | 0.22    |
| <b>Hazardous alcohol consumption</b>                |               |                   |                     |                    | <0.001  |                   |                     |                    | 0.62    |
| No                                                  | 13676 (81.8%) | 840 (66.8%)       | 3089 (75.0%)        | 2641 (83.2%)       |         | 1510 (86.3%)      | 2979 (87.3%)        | 2617 (86.9%)       |         |
| Yes                                                 | 3049 (18.2%)  | 417 (33.2%)       | 1030 (25.0%)        | 532 (16.8%)        |         | 240 (13.7%)       | 435 (12.7%)         | 395 (13.1%)        |         |
| <b>Smoking status</b>                               |               |                   |                     |                    | <0.001  |                   |                     |                    | <0.001  |
| Never smoker                                        | 6812 (42.5%)  | 379 (30.2%)       | 1356 (33.0%)        | 1403 (44.3%)       |         | 819 (53.1%)       | 1441 (46.2%)        | 1414 (50.1%)       |         |
| Current smoker                                      | 3829 (23.9%)  | 382 (30.4%)       | 1154 (28.0%)        | 625 (19.7%)        |         | 355 (23.0%)       | 794 (25.4%)         | 519 (18.4%)        |         |
| Ex-smoker                                           | 5385 (33.6%)  | 496 (39.5%)       | 1605 (39.0%)        | 1140 (36.0%)       |         | 368 (23.9%)       | 886 (28.4%)         | 890 (31.5%)        |         |
| <b>Law package period</b>                           |               |                   |                     |                    | <0.001  |                   |                     |                    | <0.001  |
| Period 1 (before 20 Oct 2000)                       | 7187 (43.0%)  | 587 (46.7%)       | 1914 (46.5%)        | 1120 (35.3%)       |         | 1022 (58.4%)      | 1429 (41.9%)        | 1115 (37.0%)       |         |
| Period 2 (20 Oct 2000 to 1 Feb 2004)                | 3550 (21.2%)  | 269 (21.4%)       | 905 (22.0%)         | 632 (19.9%)        |         | 372 (21.3%)       | 707 (20.7%)         | 665 (22.1%)        |         |
| Period 3 (2 Feb 2004 to 31 Oct 2009)                | 2467 (14.8%)  | 178 (14.2%)       | 571 (13.9%)         | 535 (16.9%)        |         | 186 (10.6%)       | 501 (14.7%)         | 496 (16.5%)        |         |
| Period 4 (after 31 Oct 2009)                        | 3521 (21.1%)  | 223 (17.7%)       | 729 (17.7%)         | 886 (27.9%)        |         | 170 (9.7%)        | 777 (22.8%)         | 736 (24.4%)        |         |

**Table 2 – Prevalence ratio, RII and SII of educational attainment and occupational level as determinants of hazardous alcohol consumption**

|                               | Men              |         |                  |         | Women             |         |                     |         |
|-------------------------------|------------------|---------|------------------|---------|-------------------|---------|---------------------|---------|
|                               | Unadjusted       |         | Adjusted*        |         | Unadjusted        |         | Adjusted*           |         |
|                               | Estimate (95%CI) | p value | Estimate (95%CI) | p value | Estimate (95%CI)  | p value | Estimate (95%CI)    | p value |
| <b>Educational Attainment</b> |                  |         |                  |         |                   |         |                     |         |
| Prevalence ratio:             |                  |         |                  |         |                   |         |                     |         |
| primary vs tertiary           | 1.98 [1.74;2.25] | p<0.001 | 1.58 [1.39;1.80] | p<0.001 | 1.05 [0.89;1.23]  | 0.58    | 0.84 [0.70;1.00]    | 0.048   |
| secondary vs tertiary         | 1.49 [1.34;1.66] | p<0.001 | 1.32 [1.18;1.47] | p<0.001 | 0.97 [0.85;1.11]  | 0.68    | 0.86 [0.74;0.99]    | 0.035   |
| RII (least to most educated)  | 2.52 [2.13;2.98] | p<0.001 | 1.87 [1.57;2.22] | p<0.001 | 1.04 [0.83;1.30]  | 0.72    | 0.76 [0.60;0.97]    | 0.026   |
| SII (least to most educated)  | 0.21 [0.18;0.25] | p<0.001 | 0.14 [0.11;0.17] | p<0.001 | 0.01 [-0.02;0.03] | 0.7     | -0.04 [-0.07;-0.01] | 0.008   |
| <b>Occupational level</b>     |                  |         |                  |         |                   |         |                     |         |
| Prevalence ratio:             |                  |         |                  |         |                   |         |                     |         |
| low vs high                   | 1.56 [1.38;1.76] | p<0.001 | 1.4 [1.24;1.59]  | p<0.001 | 1.09 [0.82;1.43]  | 0.56    | 1.09 [0.81;1.45]    | 0.58    |
| medium vs high                | 1.11 [0.97;1.28] | 0.12    | 1.07 [0.93;1.24] | 0.31    | 0.95 [0.80;1.13]  | 0.57    | 0.83 [0.70;1.00]    | 0.053   |
| RII (low to high)             | 1.99 [1.63;2.42] | p<0.001 | 1.68 [1.38;2.06] | p<0.001 | 1.00 [0.73;1.37]  | 0.99    | 0.86 [0.62;1.20]    | 0.38    |
| SII (low to high)             | 0.15 [0.11;0.18] | p<0.001 | 0.11 [0.07;0.15] | p<0.001 | 0.00 [-0.03;0.03] | 0.99    | -0.02 [-0.05;0.02]  | 0.30    |

\*adjusted for age, nationality, smoking status and survey date

All

Men

Women

a)

% with hazardous alcohol consumption

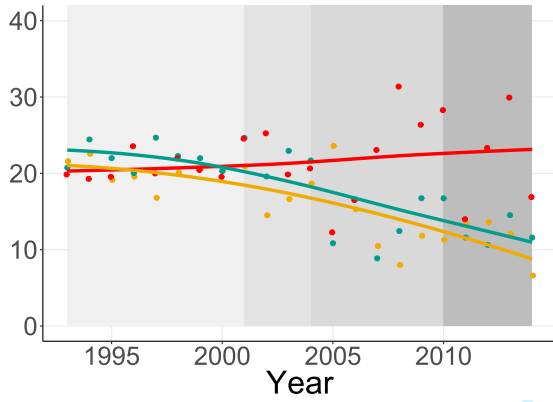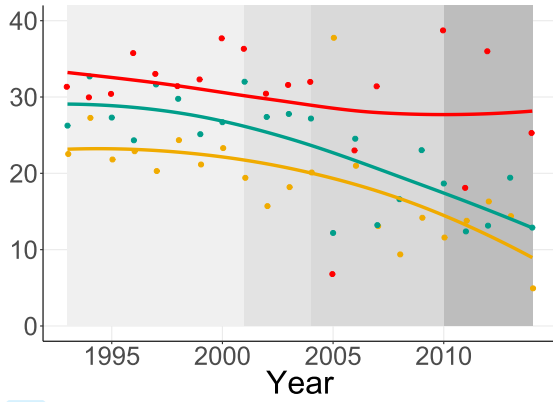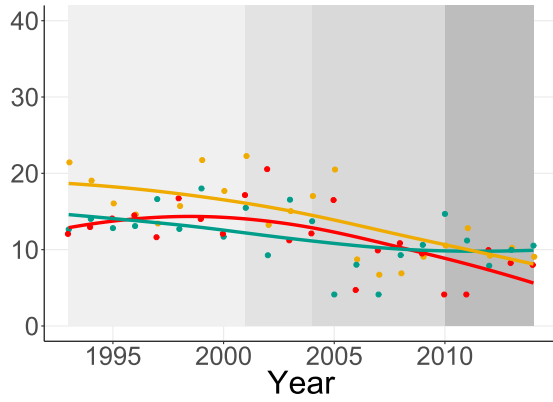

Education

Primary Secondary Tertiary

b)

% with hazardous alcohol consumption

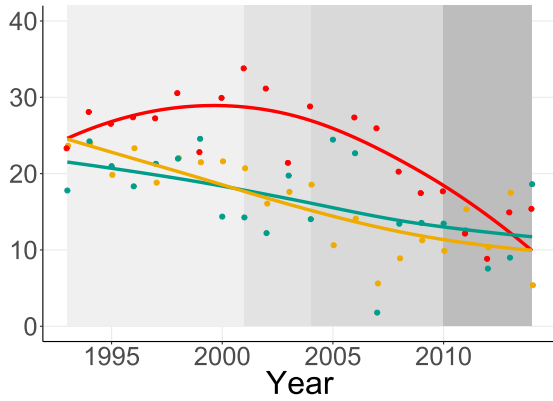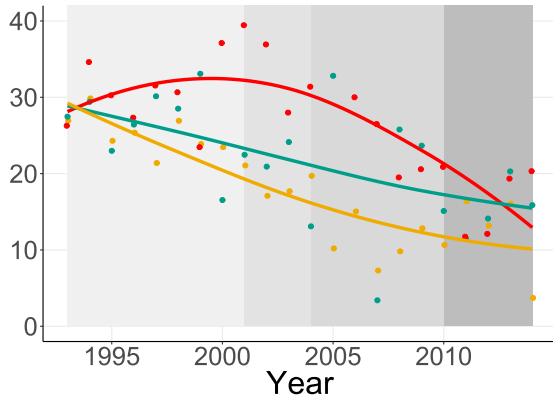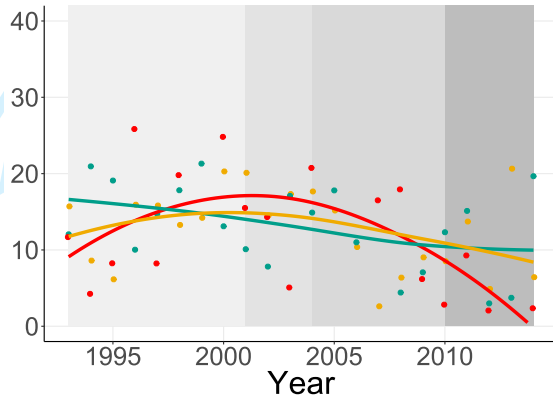

Occupational level

Low Medium High



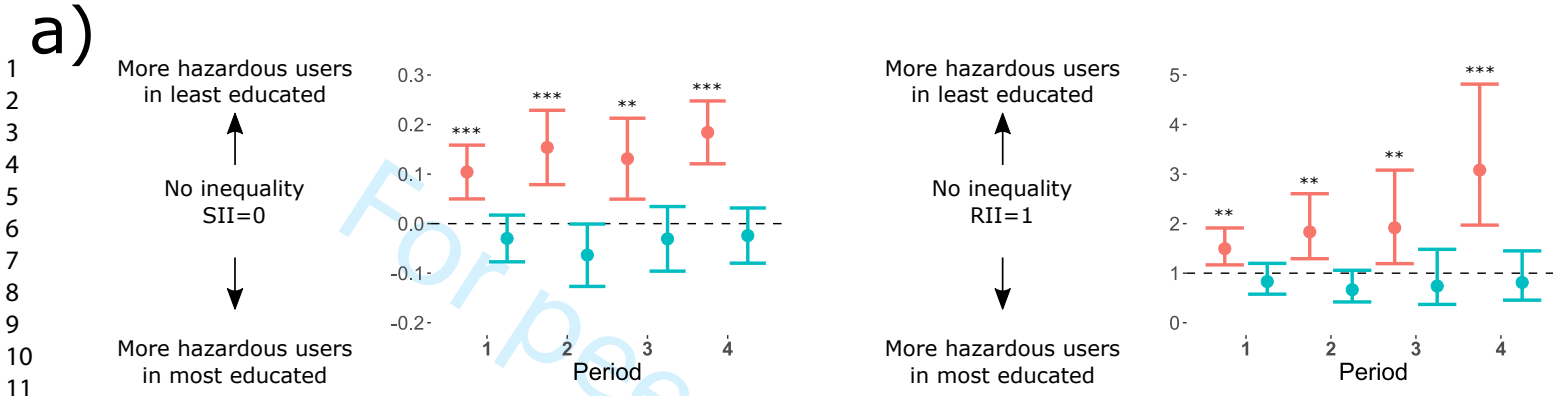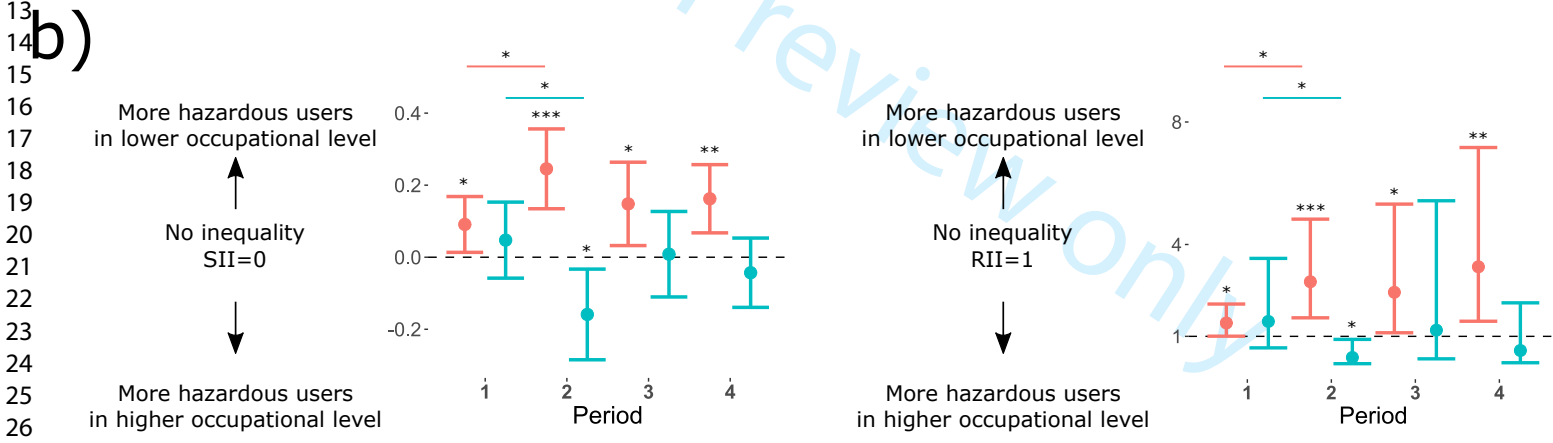

Gender  
● Men ● Women

a)

Mean alcohol  
consumption  
(g/day)

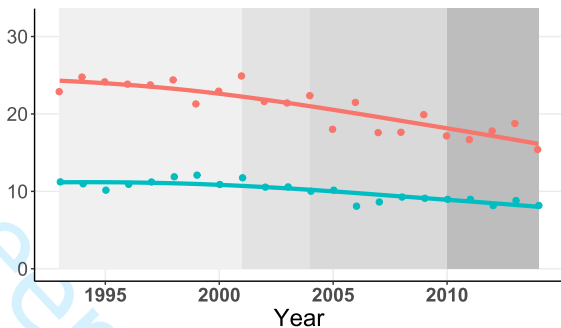

b)

%  
with hazardous  
alcohol  
consumption

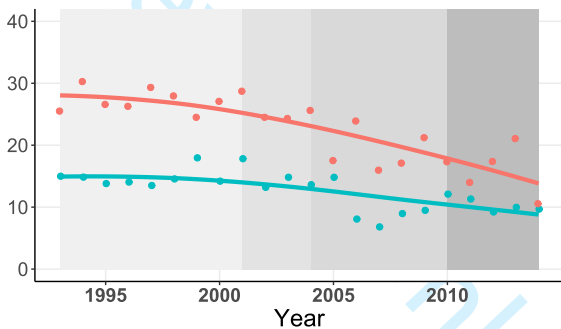

Gender

Men Women

All

Men

Women

a)

2  
3  
4  
5  
6  
7  
8  
9  
10  
11  
12  
13  
14  
15  
16  
17  
18  
19

Mean alcohol consumption (g/day)

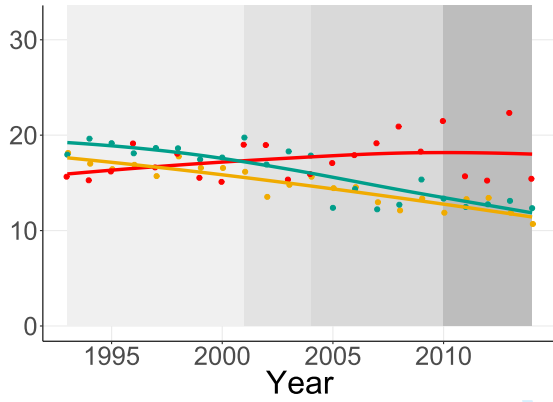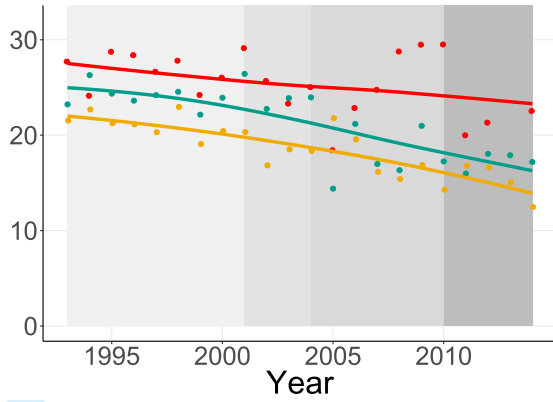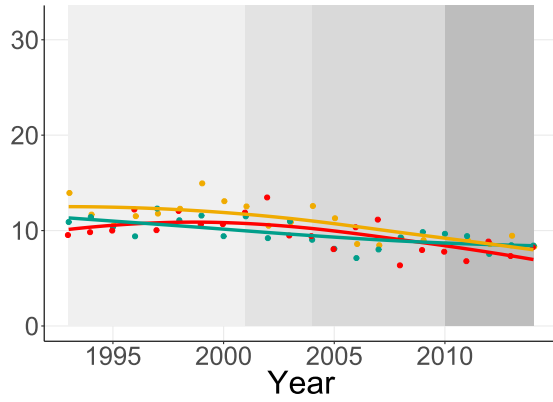

Education  
 Primary Secondary Tertiary

b)

20  
21  
22  
23  
24  
25  
26  
27  
28  
29  
30  
31  
32  
33  
34  
35  
36  
37  
38  
39  
40

Mean alcohol consumption (g/day)

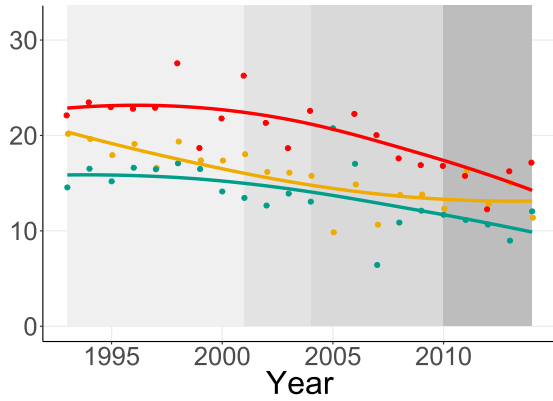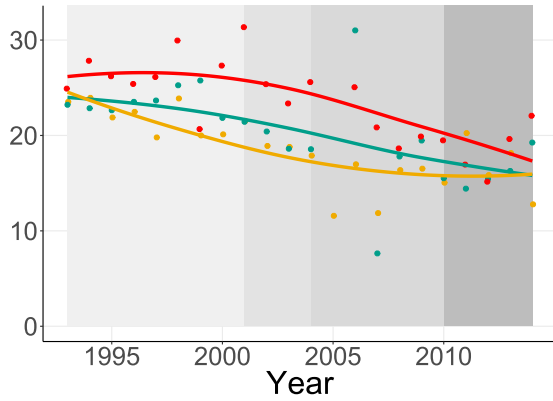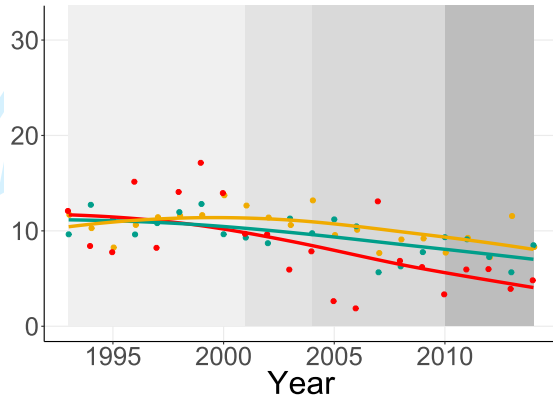

Occupational level  
 Low Medium High

a)

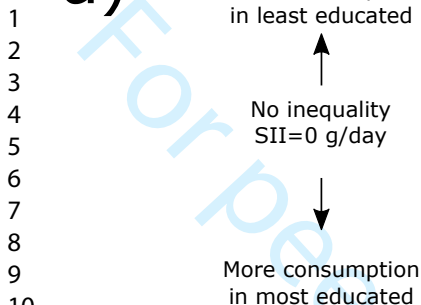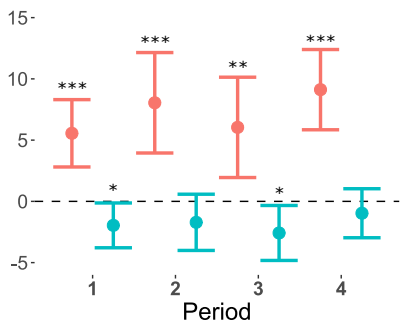

b)

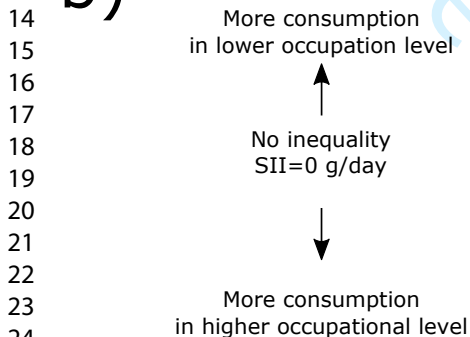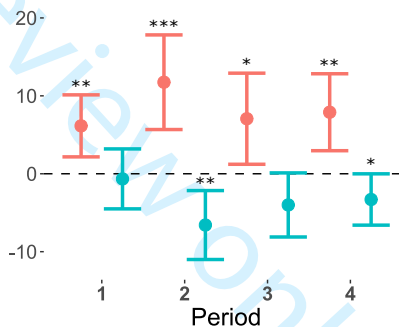

Gender

● Men ● Women

Supplementary table 1 – Participants' characteristics according to occupational level and gender (1993-2014, Bus Santé study)

|                                                     | Overall      | Men                    |                           |                         |         | Women                  |                           |                         |         |
|-----------------------------------------------------|--------------|------------------------|---------------------------|-------------------------|---------|------------------------|---------------------------|-------------------------|---------|
|                                                     |              | Low occupational level | Medium occupational level | High occupational level | p-value | Low occupational level | Medium occupational level | High occupational level | p-value |
| <b>N (%)</b>                                        | 11659 (100%) | 1696 (25.7%)           | 1441 (21.9%)              | 3457 (52.4%)            |         | 502 (9.9%)             | 2441 (48.2%)              | 2122 (41.9%)            |         |
| <b>age, mean ± SD</b>                               | 48.5 ± 8.4   | 48.3 ± 8.3             | 47.8 ± 8.3                | 49.1 ± 8.8              | <0.001  | 48.2 ± 8.6             | 48.6 ± 7.9                | 48.0 ± 8.1              | 0.037   |
| <b>Swiss nationality</b>                            |              |                        |                           |                         | <0.001  |                        |                           |                         | <0.001  |
| No                                                  | 3396 (29.1%) | 791 (46.7%)            | 432 (30.0%)               | 920 (26.6%)             |         | 253 (50.4%)            | 547 (22.4%)               | 453 (21.4%)             |         |
| Yes                                                 | 8257 (70.9%) | 904 (53.3%)            | 1009 (70.0%)              | 2534 (73.4%)            |         | 249 (49.6%)            | 1893 (77.6%)              | 1668 (78.6%)            |         |
| <b>Total alcohol consumption (g/day), mean ± SD</b> | 15.5 ± 18.6  | 24.3 ± 25.2            | 19.3 ± 21.5               | 18.7 ± 18.9             | <0.001  | 9.3 ± 12.0             | 9.1 ± 11.1                | 9.8 ± 12.1              | 0.12    |
| <b>Hazardous alcohol consumption</b>                |              |                        |                           |                         | <0.001  |                        |                           |                         | 0.57    |
| No                                                  | 9701 (83.2%) | 1222 (72.1%)           | 1153 (80.0%)              | 2837 (82.1%)            |         | 439 (87.5%)            | 2173 (89.0%)              | 1877 (88.5%)            |         |
| Yes                                                 | 1958 (16.8%) | 474 (27.9%)            | 288 (20.0%)               | 620 (17.9%)             |         | 63 (12.5%)             | 268 (11.0%)               | 245 (11.5%)             |         |
| <b>Smoking status</b>                               |              |                        |                           |                         | <0.001  |                        |                           |                         | <0.001  |
| Never smoker                                        | 4663 (41.4%) | 542 (32.0%)            | 524 (36.4%)               | 1439 (41.7%)            |         | 242 (52.4%)            | 964 (43.3%)               | 952 (48.0%)             |         |
| Current smoker                                      | 2865 (25.4%) | 540 (31.8%)            | 402 (28.0%)               | 768 (22.2%)             |         | 116 (25.1%)            | 617 (27.7%)               | 422 (21.3%)             |         |
| Ex-smoker                                           | 3732 (33.1%) | 614 (36.2%)            | 512 (35.6%)               | 1247 (36.1%)            |         | 104 (22.5%)            | 645 (29.0%)               | 610 (30.7%)             |         |
| <b>Law package period</b>                           |              |                        |                           |                         | 0.095   |                        |                           |                         | <0.001  |
| Period 1 (before 20 Oct 2000)                       | 4996 (42.9%) | 715 (42.2%)            | 678 (47.1%)               | 1476 (42.7%)            |         | 203 (40.4%)            | 1080 (44.2%)              | 844 (39.8%)             |         |
| Period 2 (20 Oct 2000 to 1 Feb 2004)                | 2498 (21.4%) | 369 (21.8%)            | 290 (20.1%)               | 736 (21.3%)             |         | 116 (23.1%)            | 548 (22.4%)               | 439 (20.7%)             |         |
| Period 3 (2 Feb 2004 to 31 Oct 2009)                | 1752 (15.0%) | 270 (15.9%)            | 197 (13.7%)               | 520 (15.0%)             |         | 65 (12.9%)             | 349 (14.3%)               | 351 (16.5%)             |         |
| Period 4 (after 31 Oct 2009)                        | 2413 (20.7%) | 342 (20.2%)            | 276 (19.2%)               | 725 (21.0%)             |         | 118 (23.5%)            | 464 (19.0%)               | 488 (23.0%)             |         |

**Supplementary table 2 – Time-series analyses of total and hazardous consumption by gender. Overall and stratified by educational attainment or occupational level**

|                               | Educational attainment |         |                     |         |                     |         |                     |         |
|-------------------------------|------------------------|---------|---------------------|---------|---------------------|---------|---------------------|---------|
|                               | All                    |         | Primary             |         | Secondary           |         | Tertiary            |         |
|                               | beta [95% CI]          | P value | beta [95% CI]       | P value | beta [95% CI]       | P value | beta [95% CI]       | P value |
| <b>Educational attainment</b> |                        |         |                     |         |                     |         |                     |         |
| Men                           |                        |         |                     |         |                     |         |                     |         |
| Alcohol consumption           | -0.34 [-0.41;-0.26]    | <0.001  | -0.10 [-0.32;0.13]  | 0.40    | -0.41 [-0.53;-0.30] | <0.001  | -0.36 [-0.46;-0.27] | <0.001  |
| Hazardous consumption         | -0.04 [-0.04;-0.03]    | <0.001  | 0.00 [-0.02;0.02]   | 0.75    | -0.04 [-0.06;-0.03] | <0.001  | -0.05 [-0.06;-0.03] | <0.001  |
| Women                         |                        |         |                     |         |                     |         |                     |         |
| Alcohol consumption           | -0.20 [-0.25;-0.15]    | <0.001  | -0.24 [-0.37;-0.10] | <0.001  | -0.16 [-0.23;-0.08] | <0.001  | -0.23 [-0.31;-0.16] | <0.001  |
| Hazardous consumption         | -0.04 [-0.05;-0.03]    | <0.001  | -0.04 [-0.07;-0.01] | 0.01    | -0.03 [-0.05;-0.01] | 0.002   | -0.04 [-0.06;-0.02] | <0.001  |
| <b>Occupational level</b>     |                        |         |                     |         |                     |         |                     |         |
| Men                           |                        |         |                     |         |                     |         |                     |         |
| Alcohol consumption           | -0.43 [-0.52;-0.35]    | <0.001  | -0.44 [-0.63;-0.25] | <0.001  | -0.42 [-0.60;-0.24] | <0.001  | -0.44 [-0.63;-0.25] | <0.001  |
| Hazardous consumption         | -0.05 [-0.06;-0.04]    | <0.001  | -0.04 [-0.06;-0.02] | <0.001  | -0.05 [-0.07;-0.03] | <0.001  | -0.06 [-0.08;-0.05] | <0.001  |
| Women                         |                        |         |                     |         |                     |         |                     |         |
| Alcohol consumption           | -0.20 [-0.26;-0.15]    | <0.001  | -0.39 [-0.57;-0.20] | <0.001  | -0.20 [-0.27;-0.12] | <0.001  | -0.17 [-0.26;-0.09] | <0.001  |
| Hazardous consumption         | -0.05 [-0.06;-0.03]    | <0.001  | -0.08 [-0.14;-0.03] | 0.002   | -0.05 [-0.07;-0.02] | 0.001   | -0.04 [-0.06;-0.01] | 0.003   |

Note: CI (confidence interval), analyses were adjusted for age, nationality and smoking status.

**Supplementary table 3 – Linear regression coefficients and SII of educational attainment and occupational level as determinants of total alcohol consumption.**

|                                 | Men                 |         |                     |         | Women               |         |                     |         |
|---------------------------------|---------------------|---------|---------------------|---------|---------------------|---------|---------------------|---------|
|                                 | Unadjusted          |         | Adjusted*           |         | Unadjusted          |         | Adjusted*           |         |
|                                 | Estimate<br>(95%CI) | p value |
| <b>Educational attainment</b>   |                     |         |                     |         |                     |         |                     |         |
| Regression coefficient          |                     |         |                     |         |                     |         |                     |         |
| primary vs tertiary education   | 8.46 [7.04;9.87]    | p<0.001 | 5.48 [4.07;6.89]    | p<0.001 | 0.46 [-0.30;1.21]   | 0.24    | -1.13 [-1.91;-0.34] | 0.005   |
| secondary vs tertiary education | 4.52 [3.51;5.52]    | p<0.001 | 2.78 [1.78;3.77]    | p<0.001 | -0.20 [-0.83;0.43]  | 0.53    | -1.25 [-1.88;-0.62] | p<0.001 |
| SII (least to most educated)    | 11.14 [9.40;12.88]  | p<0.001 | 7.10 [5.37;8.83]    | p<0.001 | 0.44 [-0.59;1.47]   | 0.4     | -1.90 [-2.97;-0.83] | p<0.001 |
| <b>Occupational Level</b>       |                     |         |                     |         |                     |         |                     |         |
| Regression coefficient          |                     |         |                     |         |                     |         |                     |         |
| low vs high                     | 5.59 [4.35;6.82]    | p<0.001 | 4.33 [3.11;5.55]    | p<0.001 | -0.51 [-1.64;0.62]  | 0.38    | -0.65 [-1.79;0.48]  | 0.26    |
| medium vs high                  | 0.60 [-0.71;1.90]   | 0.36    | 0.16 [-1.10;1.43]   | 0.8     | -0.70 [-1.38;-0.03] | 0.04    | -1.34 [-2.01;-0.67] | p<0.001 |
| SII (low to high)               | 7.98 [6.03;9.93]    | p<0.001 | 6.02 [4.09;7.94]    | p<0.001 | -1.14 [-2.37;0.09]  | 0.07    | -1.98 [-3.20;-0.76] | 0.002   |

CI (confidence interval), \*adjusted for age, nationality, smoking status and survey date

**Supplementary table 4 – Absolute (SII) and relative measures (RII) of inequality for total and hazardous alcohol consumption using educational attainment or occupational level as SES indicator. Estimates are presented for each legislative period and by gender**

|                                   | Period | Educational level   |         | Occupational level  |         |
|-----------------------------------|--------|---------------------|---------|---------------------|---------|
|                                   |        | Estimate (95%CI)    | p value | Estimate (95%CI)    | p value |
| <b>Men</b>                        |        |                     |         |                     |         |
| SII alcohol consumption           | 1      | 5.56 [2.81;8.31]    | <0.001  | 6.15 [2.17;10.13]   | 0.002   |
|                                   | 2      | 8.05 [3.95;12.15]   | <0.001  | 11.75 [5.67;17.82]  | <0.001  |
|                                   | 3      | 6.04 [1.95;10.14]   | 0.004   | 7.06 [1.22;12.91]   | 0.018   |
|                                   | 4      | 9.12 [5.85;12.40]   | <0.001  | 7.90 [2.96;12.83]   | 0.002   |
| RII hazardous alcohol consumption | 1      | 1.49 [1.17;1.91]    | 0.001   | 1.44 [1.00;2.05]    | 0.047   |
|                                   | 2      | 1.83 [1.29;2.60]    | 0.001   | 2.78 [1.61;4.83]    | <0.001  |
|                                   | 3      | 1.92 [1.19;3.08]    | 0.007   | 2.44 [1.12;5.32]    | 0.025   |
|                                   | 4      | 3.08 [1.97;4.82]    | <0.001  | 3.27 [1.49;7.17]    | 0.003   |
| SII hazardous alcohol consumption | 1      | 0.10 [0.05;0.16]    | <0.001  | 0.09 [0.01;0.17]    | 0.021   |
|                                   | 2      | 0.15 [0.08;0.23]    | <0.001  | 0.25 [0.13;0.36]    | <0.001  |
|                                   | 3      | 0.13 [0.05;0.21]    | 0.002   | 0.15 [0.03;0.26]    | 0.012   |
|                                   | 4      | 0.18 [0.12;0.25]    | <0.001  | 0.16 [0.07;0.26]    | 0.001   |
| <b>Women</b>                      |        |                     |         |                     |         |
| SII alcohol consumption           | 1      | -1.96 [-3.79;-0.13] | 0.036   | -0.66 [-4.51;3.19]  | 0.737   |
|                                   | 2      | -1.71 [-4.01;0.58]  | 0.144   | -6.58 [-11;-2.16]   | 0.004   |
|                                   | 3      | -2.58 [-4.82;-0.33] | 0.024   | -4.00 [-8.11;0.11]  | 0.057   |
|                                   | 4      | -0.97 [-2.97;1.03]  | 0.342   | -3.30 [-6.60;-0.01] | 0.049   |
| RII hazardous alcohol consumption | 1      | 0.83 [0.58;1.20]    | 0.321   | 1.49 [0.62;3.55]    | 0.37    |
|                                   | 2      | 0.67 [0.42;1.06]    | 0.085   | 0.31 [0.11;0.90]    | 0.031   |
|                                   | 3      | 0.74 [0.37;1.48]    | 0.395   | 1.20 [0.27;5.43]    | 0.812   |
|                                   | 4      | 0.81 [0.46;1.45]    | 0.483   | 0.54 [0.14;2.09]    | 0.371   |
| SII hazardous alcohol consumption | 1      | -0.03 [-0.08;0.02]  | 0.213   | 0.05 [-0.06;0.15]   | 0.378   |
|                                   | 2      | -0.06 [-0.13;0.00]  | 0.05    | -0.16 [-0.28;-0.03] | 0.013   |
|                                   | 3      | -0.03 [-0.10;0.03]  | 0.355   | 0.01 [-0.11;0.13]   | 0.89    |
|                                   | 4      | -0.02 [-0.08;0.03]  | 0.396   | -0.04 [-0.14;0.05]  | 0.381   |



**Supplementary table 5 – Educational attainment as determinant of total alcohol consumption (linear regression coefficients and SII) and hazardous consumption (prevalence ratios, RII and SII). Analysis adjusted for occupational level (including retired, unemployed and housewife/househusband)**

|                                 | Men                 |         |                     |         | Women               |         |                     |         |
|---------------------------------|---------------------|---------|---------------------|---------|---------------------|---------|---------------------|---------|
|                                 | Adjusted*           |         | +Occupational level |         | Adjusted*           |         | +Occupational level |         |
|                                 | Estimate<br>(95%CI) | p value |
| <b>Consumption</b>              |                     |         |                     |         |                     |         |                     |         |
| Regression coefficient          |                     |         |                     |         |                     |         |                     |         |
| primary vs tertiary education   | 5.48 [4.07;6.89]    | p<0.001 | 4.58 [3.06;6.1]     | p<0.001 | -1.13 [-1.91;-0.34] | 0.005   | -1.08 [-1.92;-0.24] | 0.012   |
| secondary vs tertiary education | 2.78 [1.78;3.77]    | p<0.001 | 2.17 [1.08;3.26]    | p<0.001 | -1.25 [-1.88;-0.62] | p<0.001 | -1.12 [-1.8;-0.45]  | 0.001   |
| SII (least vs most educated)    | 7.10 [5.37;8.83]    | p<0.001 | 5.96 [4;7.91]       | p<0.001 | -1.90 [-2.97;-0.83] | p<0.001 | -1.80 [-2.98;-0.61] | 0.003   |
| <b>Hazardous consumption</b>    |                     |         |                     |         |                     |         |                     |         |
| Prevalence ratio:               |                     |         |                     |         |                     |         |                     |         |
| primary vs tertiary             | 1.58 [1.39;1.80]    | p<0.001 | 1.48 [1.28;1.7]     | p<0.001 | 0.84 [0.70;1.00]    | 0.048   | 0.81 [0.67;0.97]    | 0.023   |
| secondary vs tertiary           | 1.32 [1.18;1.47]    | p<0.001 | 1.26 [1.12;1.41]    | p<0.001 | 0.86 [0.74;0.99]    | 0.035   | 0.84 [0.72;0.98]    | 0.028   |
| RII (least to most educated)    | 1.87 [1.57;2.22]    | p<0.001 | 1.71 [1.41;2.08]    | p<0.001 | 0.76 [0.60;0.97]    | 0.026   | 0.72 [0.55;0.94]    | 0.015   |
| SII (least to most educated)    | 0.14 [0.11;0.17]    | p<0.001 | 0.12 [0.08;0.16]    | p<0.001 | -0.04 [-0.07;-0.01] | 0.008   | -0.05 [-0.08;-0.01] | 0.004   |

\*adjusted for age, nationality, smoking status and survey date

**Supplementary table 6 – Occupational level as determinant of total alcohol consumption (linear regression coefficients and SII) and hazardous consumption (prevalence ratios, RII and SII). Analysis adjusted for educational attainment.**

|                              | Men                 |         |                         |         | Women               |         |                         |         |
|------------------------------|---------------------|---------|-------------------------|---------|---------------------|---------|-------------------------|---------|
|                              | Adjusted*           |         | +Educational attainment |         | Adjusted*           |         | +Educational attainment |         |
|                              | Estimate<br>(95%CI) | p value | Estimate<br>(95%CI)     | p value | Estimate<br>(95%CI) | p value | Estimate<br>(95%CI)     | p value |
| <b>Consumption</b>           |                     |         |                         |         |                     |         |                         |         |
| Regression coefficient       |                     |         |                         |         |                     |         |                         |         |
| low vs high                  | 4.33 [3.11;5.55]    | p<0.001 | 2.52 [1.13;3.91]        | p<0.001 | -0.65 [-1.79;0.48]  | 0.26    | 0.07 [-1.17;1.31]       | 0.91    |
| medium vs high               | 0.16 [-1.10;1.43]   | 0.8     | -0.60 [-1.92;0.71]      | 0.37    | -1.34 [-2.01;-0.67] | p<0.001 | -0.86 [-1.59;-0.13]     | 0.02    |
| SII (low to high)            | 6.02 [4.09;7.94]    | p<0.001 | 4.06 [1.16;6.95]        | p<0.001 | -1.98 [-3.2;-0.76]  | 0.002   | -1.58 [-3.87;0.71]      | 0.18    |
| <b>Hazardous consumption</b> |                     |         |                         |         |                     |         |                         |         |
| Prevalence ratio:            |                     |         |                         |         |                     |         |                         |         |
| low vs high                  | 1.4 [1.24;1.59]     | p<0.001 | 1.18 [1.03;1.36]        | 0.02    | 1.09 [0.81;1.45]    | 0.58    | 1.29 [0.94;1.78]        | 0.12    |
| medium vs high               | 1.07 [0.93;1.24]    | 0.31    | 0.99 [0.86;1.15]        | .89     | 0.83 [0.70;1.00]    | 0.053   | 0.93 [0.76;1.14]        | 0.48    |
| RII (low to high)            | 1.68 [1.38;2.06]    | p<0.001 | 1.37 [1.01;1.85]        | 0.04    | 0.86 [0.62;1.20]    | 0.38    | 1.16 [0.62;2.17]        | 0.65    |
| SII (low to high)            | 0.11 [0.07;0.15]    | p<0.001 | 0.07 [0.02;0.13]        | 0.01    | -0.02 [-0.05;0.02]  | 0.30    | 0.02 [-0.05;0.08]       | 0.56    |

\*adjusted for age, nationality, smoking status and survey date

Supplementary table 7 – Time-series analyses of total and hazardous alcohol consumption by gender. Overall and stratified by educational attainment or occupational level.

|                                | All                 |         | Primary             |         | Secondary           |         | Tertiary            |         |
|--------------------------------|---------------------|---------|---------------------|---------|---------------------|---------|---------------------|---------|
|                                | beta [95% CI]       | P value |
| <b>Educational attainment*</b> |                     |         |                     |         |                     |         |                     |         |
| Men                            |                     |         |                     |         |                     |         |                     |         |
| Alcohol consumption            | -0.35 [-0.42;-0.27] | <0.001  | -0.12 [-0.35;0.11]  | 0.29    | -0.42 [-0.53;-0.30] | <0.001  | -0.37 [-0.47;-0.28] | <0.001  |
| Hazardous consumption          | -0.04 [-0.04;-0.03] | <0.001  | 0.00 [-0.02;0.02]   | 0.93    | -0.04 [-0.06;-0.03] | <0.001  | -0.05 [-0.07;-0.03] | <0.001  |
| Women                          |                     |         |                     |         |                     |         |                     |         |
| Alcohol consumption            | -0.20 [-0.25;-0.15] | <0.001  | -0.27 [-0.4;-0.13]  | <0.001  | -0.15 [-0.22;-0.07] | <0.001  | -0.23 [-0.31;-0.15] | <0.001  |
| Hazardous consumption          | -0.04 [-0.05;-0.02] | <0.001  | -0.05 [-0.08;-0.02] | 0.002   | -0.03 [-0.05;-0.01] | 0.006   | -0.04 [-0.06;-0.02] | <0.001  |
| <b>Occupational level**</b>    |                     |         |                     |         |                     |         |                     |         |
| Men                            |                     |         |                     |         |                     |         |                     |         |
| Alcohol consumption            | -0.40 [-0.48;-0.31] | <0.001  | -0.44 [-0.63;-0.25] | <0.001  | -0.38 [-0.57;-0.20] | <0.001  | -0.39 [-0.49;-0.28] | <0.001  |
| Hazardous consumption          | -0.05 [-0.06;-0.04] | <0.001  | -0.04 [-0.06;-0.02] | <0.001  | -0.04 [-0.07;-0.02] | <0.001  | -0.06 [-0.07;-0.04] | <0.001  |
| Women                          |                     |         |                     |         |                     |         |                     |         |
| Alcohol consumption            | -0.21 [-0.27;-0.15] | <0.001  | -0.38 [-0.57;-0.19] | <0.001  | -0.21 [-0.29;-0.13] | <0.001  | -0.18 [-0.26;-0.09] | <0.001  |
| Hazardous consumption          | -0.05 [-0.07;-0.03] | <0.001  | -0.08 [-0.14;-0.03] | 0.003   | -0.05 [-0.08;-0.03] | <0.001  | -0.04 [-0.07;-0.01] | 0.002   |

Note: all analyses adjusted for age, nationality and smoking status. \*Educational attainment analysis adjusted for occupational level (including retire, unemployed and housewives/househusbands), \*\* occupational analysis adjusted for educational attainment

STROBE Statement—Checklist of items that should be included in reports of *cross-sectional studies*

|                              | Item No | Recommendation                                                                                                                                                                                    | Page #          |
|------------------------------|---------|---------------------------------------------------------------------------------------------------------------------------------------------------------------------------------------------------|-----------------|
| <b>Title and abstract</b>    | 1       | (a) Indicate the study's design with a commonly used term in the title or the abstract                                                                                                            | 2- abstract     |
|                              |         | (b) Provide in the abstract an informative and balanced summary of what was done and what was found                                                                                               | 2-3             |
| <b>Introduction</b>          |         |                                                                                                                                                                                                   |                 |
| Background/rationale         | 2       | Explain the scientific background and rationale for the investigation being reported                                                                                                              | 4               |
| Objectives                   | 3       | State specific objectives, including any prespecified hypotheses                                                                                                                                  | 5               |
| <b>Methods</b>               |         |                                                                                                                                                                                                   |                 |
| Study design                 | 4       | Present key elements of study design early in the paper                                                                                                                                           | 5               |
| Setting                      | 5       | Describe the setting, locations, and relevant dates, including periods of recruitment, exposure, follow-up, and data collection                                                                   | 5-6             |
| Participants                 | 6       | (a) Give the eligibility criteria, and the sources and methods of selection of participants                                                                                                       | 6               |
| Variables                    | 7       | Clearly define all outcomes, exposures, predictors, potential confounders, and effect modifiers. Give diagnostic criteria, if applicable                                                          | 6-8             |
| Data sources/<br>measurement | 8*      | For each variable of interest, give sources of data and details of methods of assessment (measurement). Describe comparability of assessment methods if there is more than one group              | 6-8             |
| Bias                         | 9       | Describe any efforts to address potential sources of bias                                                                                                                                         | 6-9             |
| Study size                   | 10      | Explain how the study size was arrived at                                                                                                                                                         | 6-7             |
| Quantitative variables       | 11      | Explain how quantitative variables were handled in the analyses. If applicable, describe which groupings were chosen and why                                                                      | 7-8             |
| Statistical methods          | 12      | (a) Describe all statistical methods, including those used to control for confounding                                                                                                             | 8               |
|                              |         | (b) Describe any methods used to examine subgroups and interactions                                                                                                                               | 8-9             |
|                              |         | (c) Explain how missing data were addressed                                                                                                                                                       | 6               |
|                              |         | (d) If applicable, describe analytical methods taking account of sampling strategy                                                                                                                | N/A             |
|                              |         | (e) Describe any sensitivity analyses                                                                                                                                                             | 9-10            |
| <b>Results</b>               |         |                                                                                                                                                                                                   |                 |
| Participants                 | 13*     | (a) Report numbers of individuals at each stage of study—eg numbers potentially eligible, examined for eligibility, confirmed eligible, included in the study, completing follow-up, and analysed | 6,10            |
|                              |         | (b) Give reasons for non-participation at each stage                                                                                                                                              | 6               |
|                              |         | (c) Consider use of a flow diagram                                                                                                                                                                | N/A             |
| Descriptive data             | 14*     | (a) Give characteristics of study participants (eg demographic, clinical, social) and information on exposures and potential confounders                                                          | Table 1 & 10-11 |
|                              |         | (b) Indicate number of participants with missing data for each variable of interest                                                                                                               | Table 1         |
| Outcome data                 | 15*     | Report numbers of outcome events or summary measures                                                                                                                                              | Table 1         |
| Main results                 | 16      | (a) Give unadjusted estimates and, if applicable, confounder-adjusted estimates and their precision (eg, 95% confidence interval). Make clear                                                     | 11-12           |

|                          |    |                                                                                                                                                                            |                      |
|--------------------------|----|----------------------------------------------------------------------------------------------------------------------------------------------------------------------------|----------------------|
|                          |    | which confounders were adjusted for and why they were included                                                                                                             |                      |
|                          |    | (b) Report category boundaries when continuous variables were categorized                                                                                                  | N/A                  |
|                          |    | (c) If relevant, consider translating estimates of relative risk into absolute risk for a meaningful time period                                                           | N/A                  |
| Other analyses           | 17 | Report other analyses done—eg analyses of subgroups and interactions, and sensitivity analyses                                                                             | 11-12 and Sup tables |
| <b>Discussion</b>        |    |                                                                                                                                                                            |                      |
| Key results              | 18 | Summarise key results with reference to study objectives                                                                                                                   | 12                   |
| Limitations              | 19 | Discuss limitations of the study, taking into account sources of potential bias or imprecision. Discuss both direction and magnitude of any potential bias                 | 14                   |
| Interpretation           | 20 | Give a cautious overall interpretation of results considering objectives, limitations, multiplicity of analyses, results from similar studies, and other relevant evidence | 13-15                |
| Generalisability         | 21 | Discuss the generalisability (external validity) of the study results                                                                                                      | 15                   |
| <b>Other information</b> |    |                                                                                                                                                                            |                      |
| Funding                  | 22 | Give the source of funding and the role of the funders for the present study and, if applicable, for the original study on which the present article is based              | 16                   |

\*Give information separately for exposed and unexposed groups.

**Note:** An Explanation and Elaboration article discusses each checklist item and gives methodological background and published examples of transparent reporting. The STROBE checklist is best used in conjunction with this article (freely available on the Web sites of PLoS Medicine at <http://www.plosmedicine.org/>, Annals of Internal Medicine at <http://www.annals.org/>, and Epidemiology at <http://www.epidem.com/>). Information on the STROBE Initiative is available at [www.strobe-statement.org](http://www.strobe-statement.org).

# BMJ Open

## Alcohol control policies and socioeconomic inequalities in hazardous alcohol consumption: a 22-year cross-sectional study in a Swiss urban population

|                                 |                                                                                                                                                                                                                                                                                                                                                                                                                                                                                                                                                                                                                                                                                                                                                                                                                                                                                                                                          |
|---------------------------------|------------------------------------------------------------------------------------------------------------------------------------------------------------------------------------------------------------------------------------------------------------------------------------------------------------------------------------------------------------------------------------------------------------------------------------------------------------------------------------------------------------------------------------------------------------------------------------------------------------------------------------------------------------------------------------------------------------------------------------------------------------------------------------------------------------------------------------------------------------------------------------------------------------------------------------------|
| Journal:                        | <i>BMJ Open</i>                                                                                                                                                                                                                                                                                                                                                                                                                                                                                                                                                                                                                                                                                                                                                                                                                                                                                                                          |
| Manuscript ID                   | bmjopen-2019-028971.R1                                                                                                                                                                                                                                                                                                                                                                                                                                                                                                                                                                                                                                                                                                                                                                                                                                                                                                                   |
| Article Type:                   | Research                                                                                                                                                                                                                                                                                                                                                                                                                                                                                                                                                                                                                                                                                                                                                                                                                                                                                                                                 |
| Date Submitted by the Author:   | 19-Mar-2019                                                                                                                                                                                                                                                                                                                                                                                                                                                                                                                                                                                                                                                                                                                                                                                                                                                                                                                              |
| Complete List of Authors:       | Sandoval, José Luis; Hopitaux Universitaires de Geneve, Unit of Population Epidemiology, Department Primary Care Medicine<br>Leão, Teresa; Universidade Nova de Lisboa Escola Nacional de Saude Publica<br>Theler, Jean-Marc; Geneva University Hospitals and Faculty of Medicine, University of Geneva, Unit of Population Epidemiology, Department Primary Care Medicine<br>Favrod-Coune, Thierry; Hopitaux Universitaires de Geneve, Addictions Unit, Department of Primary Care Medicine<br>Broers, Barbara; Hopitaux Universitaires de Geneve, Addictions Unit, Department of Primary Care Medicine<br>Gaspoz, Jean-Michel; Geneva University Hospitals and School of Medicine, Department of Primary Care Medicine<br>Marques-Vidal, Pedro; Lausanne University Hospital, Department of Internal Medicine<br>Guessous, Idris; University Hospitals of Geneva, Unit of Population Epidemiology, Department of Primary Care Medicine |
| <b>Primary Subject Heading</b>: | Public health                                                                                                                                                                                                                                                                                                                                                                                                                                                                                                                                                                                                                                                                                                                                                                                                                                                                                                                            |
| Secondary Subject Heading:      | Health policy, Addiction, Epidemiology                                                                                                                                                                                                                                                                                                                                                                                                                                                                                                                                                                                                                                                                                                                                                                                                                                                                                                   |
| Keywords:                       | Socioeconomic factors, inequality, hazardous alcohol consumption, alcohol control laws, education, occupation                                                                                                                                                                                                                                                                                                                                                                                                                                                                                                                                                                                                                                                                                                                                                                                                                            |
|                                 |                                                                                                                                                                                                                                                                                                                                                                                                                                                                                                                                                                                                                                                                                                                                                                                                                                                                                                                                          |

SCHOLARONE™  
Manuscripts

1  
2  
3 **Alcohol control policies and socioeconomic inequalities in hazardous**  
4 **alcohol consumption: a 22-year cross-sectional study in a Swiss urban**  
5 **population**  
6  
7  
8  
9

10 **Authors:** José Luis Sandoval<sup>1,2¶</sup>, Teresa Leão<sup>3¶</sup>, Jean-Marc Theler<sup>1</sup>, Thierry Favrod-  
11 Coune<sup>4</sup>, Barbara Broers<sup>4</sup>, Jean-Michel Gaspoz<sup>4</sup>, Pedro Marques-Vidal<sup>5</sup>, Idris  
12 Guessous<sup>1,4\*</sup>  
13  
14  
15  
16

17 **Affiliations**  
18

- 19  
20 1) Unit of Population Epidemiology, Department of Primary Care Medicine, Geneva  
21 University Hospitals, Rue Gabrielle-Perret-Gentil 4, 1205 Geneva, Switzerland  
22  
23 2) Department of General Internal Medicine, Rehabilitation and Geriatrics, Geneva  
24 University Hospitals, Rue Gabrielle-Perret-Gentil 4, 1205 Geneva, Switzerland  
25  
26 3) Escola Nacional de Saúde Pública, Universidade NOVA de Lisboa, Av. Padre Cruz,  
27 1600-560 Lisbon, Portugal  
28  
29 4) Division of Primary Care Medicine, Department of Primary Care Medicine, Geneva  
30 University Hospitals and Faculty of Medicine, University of Geneva, Rue Gabrielle-  
31 Perret-Gentil 4, 1205 Geneva, Switzerland  
32  
33 5) Department of Medicine, Internal Medicine, Lausanne University Hospital  
34 (CHUV), Rue du Bugnon 46, 1011 Lausanne, Switzerland  
35  
36  
37  
38  
39  
40  
41  
42  
43  
44

45 ¶These authors contributed equally, \*Corresponding author  
46

47 **Correspondence:** Prof Idris Guessous, Unit of Population Epidemiology, Department  
48 of Primary Care Medicine, Geneva University Hospitals, Rue Gabrielle-Perret-Gentil 4,  
49 1205 Geneva, Switzerland, Tel 0041223055861 Fax 0041223723015,  
50 [idris.guessous@hcuge.ch](mailto:idris.guessous@hcuge.ch)  
51  
52  
53  
54

55 **Word count:** abstract 274, main text 3601  
56  
57  
58  
59  
60

## Abstract

### Objective

Harmful use of alcohol represents a large socioeconomic and disease burden and displays a socioeconomic status (SES) gradient. Several alcohol control laws were devised and implemented, but their equity impact remains undetermined.

We ascertained if an SES gradient in hazardous alcohol consumption exists in Geneva (Switzerland) and assessed the equity impact of the alcohol control laws implemented during the last two decades.

### Design

Repeated cross-sectional survey study

### Setting

We used data from non-abstinent participants, aged 35 to 74 years, from the population-based cross-sectional Bus Santé study (n=16 725), between 1993 and 2014.

### Methods

SES indicators included educational attainment (primary, secondary and tertiary) and occupational level (high, medium and low). We defined four survey periods according to the implemented alcohol control laws, and hazardous alcohol consumption (outcome variable) as >30g/day for men and >20g/day for women.

The slope (SII) and relative (RII) indexes of inequality were used to quantify absolute and relative inequalities, respectively, and were compared between legislative periods.

### Results

Lower educated men had a higher frequency of hazardous alcohol consumption (RII=1.87 [1.57;2.22] and SII=0.14 [0.11;0.17]). Lower educated women had less hazardous consumption ((RII=0.76 [0.60;0.97] and SII=-0.04 [-0.07;-0.01]). Over time, hazardous alcohol consumption decreased, except in lower educated men.



1  
2  
3 Education-related inequalities were observed in men in all legislative periods and did  
4 not vary between them. Similar results were observed using occupational level as SES  
5 indicator. In women, significant inverse SES gradients were observed using educational  
6 attainment but not for occupational level.  
7  
8  
9  
10

## 11 **Conclusions**

12  
13  
14 Population-wide alcohol control laws did not have a positive equity impact on  
15 hazardous alcohol consumption. Targeted interventions to disadvantaged groups may be  
16 needed to address the hazardous alcohol consumption inequality gap.  
17  
18  
19  
20  
21  
22

## 23 **Strengths and limitations of this study**

- 24 • Relatively large cross-sectional study spanning 20 years
  - 25 • Use of relative and absolute inequality regression-based measures
  - 26 • Equity impact of several alcohol control measures was evaluated
  - 27 • No longitudinal data to clearly assess causality
  - 28 • Possible confounding by the 2008 economic crisis cannot be excluded.
- 29  
30  
31  
32  
33  
34  
35  
36  
37  
38  
39  
40

41 **Keywords:** Socioeconomic factors, inequality, hazardous alcohol consumption, alcohol  
42 control laws, education, occupation.  
43  
44  
45  
46  
47  
48  
49  
50  
51  
52  
53  
54  
55  
56  
57  
58  
59  
60

## 1 - INTRODUCTION

Harmful use of alcohol is responsible for a large social, economic and disease burden. According to the World Health Organization (WHO), harmful use of alcohol is estimated to represent 5.9% of worldwide mortality, accounting for 3.3 million deaths per year. Additionally, the global burden of disease and injury attributed to alcohol represents 5.1% of the total disability-adjusted life years, being in the origin of an excess of 200 injury and disease conditions.[1] Both mortality and morbidity related to alcohol consumption have increased over time.[2-4]

Considering the high burden of disease attributed to alcohol consumption, several legislative interventions were advocated by the WHO [5] and by the Organisation for Economic Co-operation and Development (OECD). Many of these interventions aiming at the reduction of harmful consumption were implemented in several countries and were met with considerable success.[6]

As in other harmful behaviours, a social gradient in alcohol consumption was identified, with higher consumption existing in individuals with lower socioeconomic status (SES).[7-9] Also, its effects on health are socially patterned with higher alcohol-related mortality in low educated individuals and manual workers,[10] and alcohol-related mortality significantly associated with the rise of unemployment rates.[11] Some institutions, like the WHO, have set practical measures to prevent the widening of alcohol-related inequalities and, ideally, to reduce them. Policies such as alcohol taxation and price rising, age limits for purchase and drink-driving, and restriction of alcohol marketing, advertising and promotion, coupled with interventions for heavy drinkers and vulnerable groups are amongst those suggested.[12] However, the impact of these policies on SES inequalities in alcohol consumption remains to be determined. Existing studies mainly focus on the equity impact of taxation policies with results

1  
2  
3 suggesting that tax increases have a strong pro-equity effect, particularly for those with  
4  
5 higher alcohol consumption.[13-14]  
6  
7

8  
9 In Geneva (Switzerland), several alcohol control laws were implemented during the last  
10  
11 two decades.[15] In 2000, an alcohol advertising ban was introduced, while in 2004  
12  
13 there was a three-fold increase in prices of alcopop beverages (e.g. premixed drinks), a  
14  
15 decrease in the alcohol driving limit, an off-premise sale interdiction between 9pm and  
16  
17 7am, and an alcohol sale interdiction in video stores and gas stations. Smoking bans  
18  
19 were suggested to reduce alcohol demand,[16-17] and such a ban was implemented in  
20  
21 Geneva in 2009. A recent study [15] showed a decrease in overall alcohol consumption  
22  
23 and in hazardous drinking, in men and women in Geneva between 1993 and 2014,  
24  
25 independently of policy changes. Still, differential impact according to SES was not  
26  
27 assessed.  
28  
29  
30  
31

32  
33 The main aim of this study was, first, to determine if an SES gradient in hazardous  
34  
35 alcohol consumption exists in the adult population of Geneva and, second, to assess the  
36  
37 impact of the implemented alcohol control policies on this gradient, if any. As a  
38  
39 secondary aim, we also sought to determine the impact of the successive legislative  
40  
41 interventions on inequalities of total daily alcohol consumption, if they existed.  
42  
43  
44  
45  
46  
47  
48  
49  
50  
51  
52  
53  
54  
55  
56  
57  
58  
59  
60

## 2 - METHODS

### 2.1 - Participants

We used data from the Bus Santé study, a continuing population-based study in the State of Geneva (population of approximately 490 000 inhabitants in 2016) monitoring health and associated risk factors. As previously described,[18] independent samples of residents were subjected to annual health examination surveys since 1993. A resident list provided by the local authorities was used to select participants who were aged 35-74 years until 2011 and 20-74 years afterwards. Gender and 10-year age strata were used for stratified random sampling. Each participant was invited to a Bus Santé study unit where trained collaborators would administer the questionnaires. One of the three study units was a mobile unit visiting different areas of the Geneva Canton while the other two were based at the Geneva University Hospitals.

Individuals who did not respond to the invitation were telephoned up to seven times at different days of the week and times of the day. If contact was not established, two extra invitations were mailed. When participants were unreachable they were considered as non-responders and replaced.

Participation rate varied with 60.1% for 1996-2003, 56.2% for 2004-2009 and 50.8% for the 2010-2014 period. Participant recruitment decreased during the period between 2005 and 2008 due to a simultaneous study taking place with shared logistical resources but not focusing on the same population.

The Bus Santé study was conducted in accordance with the principles of the Declaration of Helsinki, was granted approval by the Institute of Ethics Committee of the University of Geneva, and obtained written consent from all participants.

## 2.2 - Exclusion criteria

We included participants with ages between 35 and 74 years, the age group consistently recruited during the entirety of the Bus Santé study. We excluded abstinent participants (n=3059, 15.2%) and those with missing data on educational attainment (n=368, 2.2%), assumed to be missing completely at random. For occupational level analysis, participants that were not working (unemployed n=789, 4.7%; retired n=2753, 16.4% and housewives/househusbands n=1635, 9.7%) or with missing for this variable (n=257, 1.5%) were also excluded.

## 2.3 - Outcome variable

The main outcome variable was hazardous alcohol consumption (>30g/day for men and >20g/day for women) established based on data from total daily alcohol intake in g/day. Hazardous alcohol consumption was defined according to the Swiss Institute for Alcohol and Drug Prevention guidelines in 2017 (<http://www.iard.org/wp-content/uploads/2016/02/Drinking-Guidelines-General-Population.pdf>) and like previous studies on Swiss alcohol consumption.[19] Total daily alcohol intake was determined using a validated food frequency questionnaire (FFQ), as previously described,[15] taking into account consumption frequency, type of alcoholic beverage (wine, champagne, beer, aperitifs such as anisette or martini, and spirits like liqueur, brandy or whisky) and average serving size compared to a 10g alcohol standard for each beverage (similar, bigger or smaller). The same FFQ was used throughout the totality of the study, with the resulting data having incorporated large international consortia.[20]

## 2.4 - Covariates

We created a categorical variable identifying participants who were surveyed during periods that differed in the implemented alcohol control laws: period 1 (before 20/10/2000, baseline), period 2 (from 20/10/2000 to 01/02/2004 - introduction of

1  
2  
3 advertising ban), period 3 (from 02/02/2004 to 31/10/2009 - 300% increase in alcopop  
4 price, decrease of legal alcohol driving limit, off-premise sale interdiction of alcoholic  
5 beverages from 9pm to 7am and gas stations and video stores are no longer allowed to  
6 sell alcohol) and period 4 (from 01/11/2009 onwards – implementation of a public  
7 smoking ban).

8  
9  
10 As in Huisman et al., [21] we considered educational attainment in 3 levels: i) Primary -  
11 no end of school certification (“Maturité”) or no professional apprenticeship, ii)  
12 Secondary - obtaining “Maturité” or professional apprenticeship and iii) Tertiary  
13 (university degree).

14  
15  
16 Current occupation was categorised into three categories according to the British  
17 Registrar General’s Scale:[22] high (professional and intermediate professions),  
18 medium (non-manual occupations) and low (manual or lower occupations).

19  
20  
21 Age was used as a continuous variable; smoking status was classified into never  
22 smokers, current smokers and ex-smokers, and nationality as Swiss or other.

## 23 24 25 **2.5 - Statistical analysis**

26  
27  
28 For descriptive statistics, continuous variables are presented as mean  $\pm$  standard  
29 deviation (SD) while categorical ones as absolute and relative frequencies.

30  
31  
32 Chi-squared test of independence and one-way ANOVA were used to assess the  
33 significance of group differences in categorical and continuous variables, respectively.

34  
35  
36 All analyses were stratified by gender. Outcome proportions in different survey years,  
37 as displayed in Figure 1 and Supplementary Figure 1, were age-adjusted using the age  
38 distribution of the Swiss population in 2014  
39 (<https://www.bfs.admin.ch/bfs/en/home/statistics/population.html>).

40  
41  
42 Time-series analyses were performed (overall and stratified by educational attainment  
43 or occupational level), using adjusted linear (for total consumption) or binomial (for  
44  
45  
46  
47  
48  
49  
50  
51  
52  
53  
54  
55  
56  
57  
58  
59  
60

1  
2  
3 hazardous consumption) regression models. Coefficients for the calendar year variable  
4  
5 are reported.  
6

7  
8 Poisson regression models were used to test the association between exposure  
9  
10 (educational attainment and occupational level) and outcome variables (hazardous  
11  
12 alcohol consumption and total daily alcohol consumption), and to estimate prevalence  
13  
14 ratios (PR). Besides age, nationality and smoking status, models were also adjusted for  
15  
16 survey date in calendar years to take secular trends into account.[23-25]  
17

18  
19 We used the STATA package *RIIGEN* [26-27] to calculate SES variables adjusted for  
20  
21 group size and relative SES position using a ridity scoring method. These variables were  
22  
23 then used to calculate the slope index of inequality (SII) and the relative index of  
24  
25 inequality (RII) which quantify absolute and relative differences between SES-defined  
26  
27 strata, respectively. For total daily alcohol consumption, a continuous outcome variable,  
28  
29 we chose to only calculate the SII since it is more interpretable than a relative measure  
30  
31 in this context and this was not the main outcome variable of the study.  
32  
33

34  
35 These regression-based indexes describe differences between the SES extremes taking  
36  
37 into account the intermediate categories.[27] For instance, RII=1.3 represents an added  
38  
39 30% outcome prevalence in the lowest SES group compared to the highest, similar to a  
40  
41 prevalence ratio. SII, an impact measure, indicates the absolute difference in outcome  
42  
43 prevalence between lowest and highest SES groups. For example, SII=0.3 indicates 30  
44  
45 more individuals with the outcome per 100 individuals in the lowest SES group  
46  
47 compared to the highest one. When used with continuous variables, as total alcohol  
48  
49 consumption, SII=4 would indicate an excess consumption of 4g/day in the lowest SES  
50  
51 group when compared to the highest.  
52  
53

54  
55 Both indexes were calculated for each of the four periods and compared between them  
56  
57 using pairwise Wald tests.  
58  
59  
60

1  
2  
3 Sensitivity analyses of the educational attainment and the occupational level-based  
4 models were performed through adjustment for a second SES indicator (occupational  
5 level or educational attainment, respectively). Adjustment of educational attainment  
6 model by occupational level included non-working individuals: retired, unemployed and  
7 housewives/househusbands. Reciprocal adjustment did not change the overall trends  
8 (sensitivity analyses can be found in Supplementary Tables 1-3). A sensitivity analysis  
9 for interperiod differences in SES inequalities indexes was also performed through  
10 testing for significant interactions between the RIIGEN-generated SES variables and  
11 legislative period (Supplementary Table 4).

12  
13  
14  
15  
16  
17  
18  
19  
20  
21  
22  
23 Data were analysed using STATA 13.1 and R 3.2.2.

## 24 25 26 **2.6 – Patient and public involvement**

27  
28 Patients and the public were not involved in developing the research question, study  
29 design or outcome measures. While direct dissemination of study results has not been  
30 planned, they will be communicated through our institutional media services.

## 31 32 33 34 35 36 **3 - RESULTS**

### 37 38 39 **3.1 - Characteristics of participants**

40  
41 Forty-three per cent of participants were surveyed in period 1, 21.2% in period 2, 14.8%  
42 in period 3 and 21.1% in period 4.

43  
44  
45 The participant characteristics stratified by gender and educational attainment can be  
46 found in Table 1. For education-based analyses, we included 16 725 participants of  
47 which 18.0% had primary education, 45.0% secondary education and 37.0% tertiary  
48 education. The mean daily consumption of alcohol was 15.9±18.9 g/day and 18.2%  
49 were found to have hazardous alcohol consumption. When stratified by gender and  
50 educational attainment, higher educated participants of both genders were younger and  
51 less probably current smokers. Furthermore, daily alcohol consumption and the  
52  
53  
54  
55  
56  
57  
58  
59  
60



1  
2  
3 proportion of participants with hazardous alcohol consumption were higher in lower  
4  
5 educated men, while no differences could be observed in women.  
6

7  
8 For the occupational level analysis, we included 11 659 working participants and their  
9  
10 characteristics are reported in Supplementary Table 5. Similarly to the educational  
11  
12 attainment stratification, lower alcohol consumption and lower proportion of  
13  
14 consumption at risk were found in men with high occupational level and no differences  
15  
16 were observed amongst women.  
17

### 18 19 20 **3.2 - Time trends of hazardous alcohol consumption**

21  
22 Alcohol consumption (Supplementary Figure 2a) and the proportion of drinkers with  
23  
24 hazardous consumption (Supplementary Figure 2b) have decreased in both genders  
25  
26 between 1993 and 2014 (Supplementary Table 6). Yet, when time trends were stratified  
27  
28 by educational attainment, we observed that the decrease has not occurred similarly  
29  
30 across all educational attainment-related groups, since men with primary education did  
31  
32 not display a reduction in hazardous alcohol consumption like their counterparts with  
33  
34 secondary and tertiary education (Figure 1a). However, when using occupational level  
35  
36 as an SES indicator, after an initial increase in hazardous consumption in participants  
37  
38 with low occupational level, a decrease could be observed in later periods (Figure 1b).  
39  
40 To test if the observed time trends were not due to differences in participant  
41  
42 characteristics other than educational attainment and occupational level, data were fitted  
43  
44 into multivariable binomial models to obtain adjusted time trends (Supplementary Table  
45  
46 6). We identified negative adjusted time trends for both outcomes, in both genders  
47  
48 ( $\beta_{\text{hazardous consumption in men}} = -0.04 [-0.04; -0.03]$   $p < 0.001$ ,  $\beta_{\text{hazardous consumption in women}} = -0.04 [-$   
49  
50  $0.05; -0.03]$   $p < 0.001$ ). As suggested by Figure 1a and Supplementary Table 6, adjusted  
51  
52 time trend analysis stratified by educational attainment showed that hazardous  
53  
54 consumption did not change among men with primary education ( $\beta_{\text{primary}} = -0.00 [-$   
55  
56  
57  
58  
59  
60

0.02;0.02]  $p=0.75$ ), while it decreased among men with secondary or tertiary education ( $\beta_{\text{secondary}}=-0.04$  [-0.06;-0.03]  $p<0.001$ ;  $\beta_{\text{tertiary}}=-0.05$  [-0.06;-0.03]  $p<0.001$ ). For women, the time trends were all negative. Analyses stratified by occupational level revealed a harmonious decrease in hazardous alcohol consumption in all levels and for both genders (Supplementary Table 6).

Similar results were observed when total daily alcohol intake was used as the outcome variable (Supplementary Figure 1a-b, Supplementary Table 6). However, contrarily to hazardous alcohol consumption for which no inequalities in women were observed in any of the periods, significant inequalities favouring the lower SES groups were observed in periods 1 and 3 (Supplementary Figure 3).

### 3.3 - Association between educational attainment, occupational level and hazardous alcohol consumption

We observed more hazardous consumption in lower educated men ( $PR_{\text{primary vs tertiary}}=1.58$  [1.39;1.80]  $p<0.001$ ,  $PR_{\text{secondary vs tertiary}}=1.32$  [1.18;1.47]  $p<0.001$ ) with this being reflected in the relative and absolute indexes of inequality ( $RII=1.87$  [1.57;2.22]  $p<0.001$  and  $SII=0.14$  [0.11;0.17]  $p<0.001$ , respectively) (Table 2). On the other hand, lower education was associated with less hazardous consumption in women ( $RII=0.76$  [0.60;0.97]  $p=0.026$  and  $SII=-0.04$  [-0.07;-0.01]  $p=0.008$ ) (Table 2).

An occupational level-related gradient was observed in men, those with lower occupational level having a higher proportion of hazardous consumption ( $RII=1.68$  [1.38;2.06]  $p<0.001$  and  $SII=0.11$  [0.07;0.15]  $p<0.001$ ) (Table 2). Conversely, no such gradient was found in women (Table 2).

Similar findings were obtained for total daily alcohol intake, except for women with a lower occupational level which displayed lower daily alcohol consumption (Supplementary Table 7).

### 3.4 - Alcohol laws, alcohol consumption, and SES inequalities

In men, we identified absolute and relative education-related inequalities in hazardous alcohol consumption in all periods and favouring the most educated (Figure 2a, Supplementary Table 8). No differences between successive periods were observed ( $p>0.05$ ) (Figure 2a). In women, no education-related inequalities were observed during the various legislative periods (Figure 2a, Supplementary Table 8).

Occupational level-related inequalities in men were also observed in absolute and relative terms and increased between period 1 and 2 ( $p<0.05$ ), remaining constant thereafter (Figure 2b, Supplementary Table 8).

In women, inequalities in favour of those with lower occupational level were only observed in period 2, with an increase being observed between period 1 and 2 ( $p<0.05$ ) (Figure 2b, Supplementary Table 8).

Similar results were obtained concerning daily alcohol intake (Supplementary Figure 3a-b, Supplementary Table 8).

Time trend interaction-based sensitivity analysis for education-related inequalities identified a difference in relative inequalities in period 4 (compared to the reference period 1), which seemed to increase (interaction=2.2 [1.3;3.6],  $p=0.002$ , Supplementary Table 4). The same analysis using occupation level as SES indicator identified the differences mentioned above between period 1 and 2 in both genders, but also an increase in relative inequalities in men in period 4 (interaction=2.6 [1.1;6.2],  $p=0.02$ , Supplementary Table 4).

#### 4 - DISCUSSION

We identified a social gradient in alcohol drinking patterns among men, with lower SES being associated with higher proportion of hazardous consumption and higher total daily alcohol consumption. In women, a less pronounced inverse gradient was observed with higher SES being associated with higher hazardous consumption and higher total daily consumption. Differently from men for whom the inequalities in hazardous consumption were observed using both SES indicators, in women the inequalities were only related to educational attainment.

These patterns were also found in other studies: low education and manual occupation males tend to have a higher prevalence of alcohol consumption, contrarily to women.[6-7] This gender discrepancy in inequalities suggests that different mechanisms, other than those related to SES, are behind hazardous alcohol consumption in each of the genders. While the reasons behind this discrepancy are still elusive, it is possible that like tobacco smoking,[28] among women, alcohol consumption started to be seen as a symbol of increased socioeconomic status and emancipation.[29-30] Like the tobacco industry, the alcohol industry seems to be exploiting this fact.[31] As such, policies to address inequalities in alcohol consumption should be gender-adapted and informed by further studies on their nature.

We also observed a discrepancy between time trends when educational attainment or occupational level were used as SES indicators. Sensitivity analyses showed that this was not due to the educational attainment-based analysis including non-working participants. SES indicators such as education and occupational level often display low to moderate correlations and cannot be used interchangeably.[32-34] Furthermore, each indicator may be related to different causal mechanisms and can be differentially associated with a specific health-related outcome.[32] It is thus possible that lower

1  
2  
3 education has a wider impact on other SES-related determinants of persistent alcohol  
4 consumption than occupation, justifying the observed discrepancies in alcohol  
5 consumption trends.  
6  
7  
8  
9

10 Differently from previous studies, we studied the evolution of alcohol drinking patterns  
11 during a 22-year period. Though hazardous consumption decreased in both genders,  
12 inequalities in alcohol consumption remained stable among men, with relative  
13 inequalities in men potentially increasing during the latter period of the study when  
14 compared to earlier ones. No specific inequality patterns were identified for the periods  
15 with different legislative alcohol control measures (advertising ban, a three-fold  
16 increase in alcopop price, a decrease of legal alcohol driving limit, and ban of the off-  
17 premise sale of alcoholic beverages from 9pm to 7am and at gas stations and video  
18 stores). The lack of equity impact of these measures can potentially be explained in light  
19 of the recommendations and reports by the WHO [12] and OECD.[6] Though these  
20 institutions recommend raising the taxes of all alcoholic products, the OECD described  
21 Switzerland as having mild alcohol taxation with some of the lowest taxes on beer and  
22 wine.[6] Moreover, increasing the tax on an alcoholic product does not directly reduce  
23 consumption, since it does not guarantee an increase in the final price of the product, or  
24 a relevant price increase considering the populations' purchasing power. A recent report  
25 pointed out that price increases due to taxation were regressive measures in nature, with  
26 a bigger financial burden on individuals with low SES, thus with a potential positive  
27 equity impact.[35] However, this study was mainly based on data from low/middle-  
28 income countries where the majority of consumers belong to high SES strata. Lack of  
29 data concerning high-income countries precluded the same analysis in this context. Our  
30 results suggest that the increase in tax on alcopop beverages did not have a positive  
31 equity impact in hazardous alcohol consumption and further increases in taxation of  
32  
33  
34  
35  
36  
37  
38  
39  
40  
41  
42  
43  
44  
45  
46  
47  
48  
49  
50  
51  
52  
53  
54  
55  
56  
57  
58  
59  
60

1  
2  
3 other alcoholic products are probably needed. Also, easy circulation between  
4  
5 neighbouring regions and countries may have allowed smuggling of beverages with a  
6  
7 lower price. This is particularly relevant for regions like Geneva due to its proximity to  
8  
9 the France-Switzerland border. Finally, and even though our study covered a relatively  
10  
11 long period, legislative measures may have a delayed impact in time, not observable in  
12  
13 the time span of this study.  
14  
15

#### 16 17 18 **4.1 - Strengths**

19  
20 We analysed a population-based sample of participants from a single region spanning a  
21  
22 22-year period. This relatively homogeneous sample allowed us not only to measure  
23  
24 alcohol consumption and its inequalities in this population but also to follow them in  
25  
26 different periods according to which alcohol control laws were implemented. We used  
27  
28 two SES indicators (educational attainment and occupational level) and the lack of  
29  
30 effect of alcohol control measures on inequalities based on both indicators further  
31  
32 increases the robustness of our findings. Furthermore, we measured inequalities and  
33  
34 their trends complementing the relative with absolute measures in order to determine the  
35  
36 impact that interventions to reduce inequalities could have had on the outcomes.[27, 36]  
37  
38  
39  
40

#### 41 42 **4.2 - Limitations**

43  
44 Our study has several limitations. First, it was based on self-reported repeated cross-  
45  
46 sectional data instead of longitudinal, not allowing the follow-up of alcohol  
47  
48 consumption and its inequalities at the individual level. Second, the participation rate, as  
49  
50 in another cross-sectional survey studies, ranged between 51% and 60%, and,  
51  
52 accordingly, selection bias cannot be excluded. Third, strong enforcement and  
53  
54 coordinated multi-level approach are capital for effective implementation of alcohol  
55  
56 control laws. Unfortunately, we could not evaluate the degree of law enforcement as no  
57  
58 data on measure adoption were available, and we were not able to control for the price  
59  
60

1  
2  
3 trends of the alcoholic products. Also, the implemented laws could have had a  
4  
5 differential effect on population subgroups defined by factors other than SES indicators.  
6  
7 The mental and general health status of the participants was also not taken into account  
8  
9 and confounding by these variables cannot be excluded. The effects of each legislative  
10  
11 package could have been delayed in time and appeared on subsequent periods or even  
12  
13 beyond the time frame of this study. Moreover, the time span of this study included the  
14  
15 2008 economic crisis, which may have impacted on alcohol consumption and its  
16  
17 inequalities, as noted by Stuckler et al.[11] Finally, besides confounding by other  
18  
19 unrecorded factors, our study is based on a single region of a high-income country,  
20  
21 probably limiting the generalisability of the findings to settings that differ greatly from  
22  
23 Geneva.  
24  
25  
26  
27  
28

## 29 5 - CONCLUSION

30  
31 In the male adult population of Geneva, SES inequalities in hazardous alcohol  
32  
33 consumption were identified, favouring the better off. An inverse, but less pronounced  
34  
35 SES gradient was observed in women. The successive anti-alcohol legislation  
36  
37 implemented in the last 20 years was unable to reduce the SES inequalities in men. To  
38  
39 close the inequality gap in this harmful behaviour in settings similar to Geneva,  
40  
41 evaluating the equity impact of legislative interventions and using adjuvant targeted  
42  
43 measures could be of great importance.  
44  
45  
46  
47

48 **Funding:** The Bus Santé study is funded by the General Directorate of Health, Canton  
49  
50 of Geneva, Switzerland and the Geneva University Hospitals.  
51

52  
53 **Ethics approval:** Institute of Ethics Committee of the University of Geneva. The study  
54  
55 complies with the ethical standards established by the Declaration of Helsinki and  
56  
57 informed consent was obtained from all participants.  
58  
59  
60

1  
2  
3 **Author contributions:** José Luis Sandoval and Teresa Leão: conceptualisation,  
4 analysis and interpretation of results, manuscript writing and revision. Jean-Marc  
5 Theler, Thierry Favrod-Coune, Barbara Broers, Jean-Michel Gaspoz, Pedro Marques  
6 Vidal: data collection, interpretation of results, manuscript reviewing and final editing  
7 the final manuscript. Idris Guessous: conceptualisation, data collection, interpretation of  
8 results, manuscript writing and revision.  
9

10  
11  
12 **Conflict of interest:** no conflict declared.  
13  
14

15  
16  
17 **Acknowledgements:** the authors are grateful to the Bus Santé study participants whose  
18 data has made this study possible.  
19  
20

21  
22  
23 **Data sharing statement:** Consent has not been obtained to share the data publicly.  
24 However, data may be accessed upon contacting the corresponding author. The same  
25 principle applies for statistical analysis scripts.  
26  
27  
28  
29  
30  
31  
32  
33  
34  
35  
36  
37  
38  
39  
40  
41  
42  
43  
44  
45  
46  
47  
48  
49  
50  
51  
52  
53  
54  
55  
56  
57  
58  
59  
60



## REFERENCES

1. Poznyak V and Rekke D. eds. *Global status report on alcohol and health, 2014*. 2014, World Health Organization - Management of Substance Abuse Unit: Geneva, Switzerland.
2. GBD 2015 Risk Factors Collaborators. Global, regional, and national comparative risk assessment of 79 behavioural, environmental and occupational, and metabolic risks or clusters of risks, 1990-2015: a systematic analysis for the Global Burden of Disease Study 2015. *Lancet* 2016.388(10053):p.1659-1724.
3. GBD 2016 Risk Factors Collaborators. Global, regional, and national comparative risk assessment of 84 behavioural, environmental and occupational, and metabolic risks or clusters of risks, 1990-2016: a systematic analysis for the Global Burden of Disease Study 2016. *Lancet* 2017.390(10100):p.1345-1422.
4. Forouzanfar MH, Alexander L, Anderson HR, et al. Global, regional, and national comparative risk assessment of 79 behavioural, environmental and occupational, and metabolic risks or clusters of risks in 188 countries, 1990-2013: a systematic analysis for the Global Burden of Disease Study 2013. *Lancet* 2015.386(10010):p.2287-323.
5. WHO. ed. *European action plan to reduce the harmful use of alcohol 2012-2020*. 2012, World Health Organization - Regional office for Europe: Copenhagen, Denmark.
6. Sassi F. ed. *Tackling Harmful Alcohol Use*. 2015, OECD Publishing.
7. Bloomfield K, Grittner U, Kramer S, et al. Social inequalities in alcohol consumption and alcohol-related problems in the study countries of the EU concerted action 'Gender, Culture and Alcohol Problems: a Multi-national Study'. *Alcohol Alcohol Suppl* 2006.41(1):p.i26-36.
8. Kuntsche E, Rehm J, and Gmel G. Characteristics of binge drinkers in Europe. *Soc Sci Med* 2004.59(1):p.113-27.
9. Marmot M, Allen J, Bell R, et al. WHO European review of social determinants of health and the health divide. *Lancet* 2012.380(9846):p.1011-29.
10. Mackenbach JP, Kulhanova I, Bopp M, et al. Inequalities in Alcohol-Related Mortality in 17 European Countries: A Retrospective Analysis of Mortality Registers. *PLoS Med* 2015.12(12):p.e1001909.
11. Stuckler D, Basu S, Suhrcke M, et al. The public health effect of economic crises and alternative policy responses in Europe: an empirical analysis. *Lancet* 2009.374(9686):p.315-23.
12. Loring B. *Alcohol and Inequities: Guidance for Addressing Inequities in Alcohol-Related Harm 2014*, WHO: Copenhagen, Denmark.
13. Meier PS, Holmes J, Angus C, et al. Estimated Effects of Different Alcohol Taxation and Price Policies on Health Inequalities: A Mathematical Modelling Study. *PLoS Med* 2016.13(2):p.e1001963.
14. Holmes J, Meng Y, Meier PS, et al. Effects of minimum unit pricing for alcohol on different income and socioeconomic groups: a modelling study. *Lancet* 2014.383(9929):p.1655-1664.
15. Dumont S, Marques-Vidal P, Favrod-Coune T, et al. Alcohol policy changes and 22-year trends in individual alcohol consumption in a Swiss adult population: a 1993-2014 cross-sectional population-based study. *BMJ Open* 2017.7(3):p.e014828.

16. Kasza KA, McKee SA, Rivard C, et al. Smoke-free bar policies and smokers' alcohol consumption: findings from the International Tobacco Control Four Country Survey. *Drug Alcohol Depend* 2012.126(1-2):p.240-5.
17. Picone GA, Sloan F, and Trogdon JG. The effect of the tobacco settlement and smoking bans on alcohol consumption. *Health Econ* 2004.13(10):p.1063-80.
18. Guessous I, Bochud M, Theler JM, et al. 1999-2009 Trends in prevalence, unawareness, treatment and control of hypertension in Geneva, Switzerland. *PLoS One* 2012.7(6):p.e39877.
19. Gmel G, Klingemann S, Muller R, et al. Revising the preventive paradox: the Swiss case. *Addiction* 2001.96(2):p.273-84.
20. Micha R, Khatibzadeh S, Shi P, et al. Global, regional, and national consumption levels of dietary fats and oils in 1990 and 2010: a systematic analysis including 266 country-specific nutrition surveys. *BMJ* 2014.348:p.g2272.
21. Huisman M, Kunst AE, and Mackenbach JP. Educational inequalities in smoking among men and women aged 16 years and older in 11 European countries. *Tob Control* 2005.14(2):p.106-13.
22. Leete R and Fox J. Registrar Generals social classes: origins and uses. *Population trends* 1977(8):p.1-7.
23. Agaku IT, King BA, and Dube SR. Current cigarette smoking among adults - United States, 2005-2012. *MMWR Morb Mortal Wkly Rep* 2014.63(2):p.29-34.
24. Regidor E, Pascual C, Giraldez-Garcia C, et al. Impact of tobacco prices and smoke-free policy on smoking cessation, by gender and educational group: Spain, 1993-2012. *Int J Drug Policy* 2015.26(12):p.1215-21.
25. Becker GS, Grossman M, and Murphy KM. An empirical analysis of cigarette addiction. *American Economic Review* 1994.84:p.396-418.
26. Kroll LE. RIIGEN: Stata module to generate Variables to Compute the Relative Index of Inequality. Boston College Department of Economics. 2013.
27. Mackenbach JP and Kunst AE. Measuring the magnitude of socio-economic inequalities in health: an overview of available measures illustrated with two examples from Europe. *Soc Sci Med* 1997.44(6):p.757-71.
28. Amos A and Haglund M. From social taboo to "torch of freedom": the marketing of cigarettes to women. *Tob Control* 2000.9(1):p.3-8.
29. Emslie C, Hunt K, and Lyons A. Transformation and time-out: the role of alcohol in identity construction among Scottish women in early midlife. *Int J Drug Policy* 2015.26(5):p.437-45.
30. Eriksen S. Alcohol as a gender symbol. *Scand J Hist* 1999.24(1):p.45-73.
31. Lyons AC, Dalton SI, and Hoy A. 'Hardcore drinking': portrayals of alcohol consumption in young women's and men's magazines. *J Health Psychol* 2006.11(2):p.223-32.
32. Geyer S, Hemstrom O, Peter R, et al. Education, income, and occupational class cannot be used interchangeably in social epidemiology. Empirical evidence against a common practice. *J Epidemiol Community Health* 2006.60(9):p.804-10.
33. Muller A. Education, income inequality, and mortality: a multiple regression analysis. *BMJ* 2002.324(7328):p.23-5.
34. Sandoval JL, Theler JM, Cullati S, et al. Introduction of an organised programme and social inequalities in mammography screening: A 22-year population-based study in Geneva, Switzerland. *Prev Med* 2017.103:p.49-55.

- 1  
2  
3 35. Sassi F, Belloni A, Mirelman AJ, et al. Equity impacts of price policies to  
4 promote healthy behaviours. *Lancet* 2018.391(10134):p.2059-2070.  
5  
6 36. Charafeddine R, Demarest S, Van der Heyden J, et al. Using multiple measures  
7 of inequalities to study the time trends in social inequalities in smoking. *Eur J*  
8 *Public Health* 2013.23(4):p.546-51.  
9  
10  
11  
12  
13  
14  
15  
16  
17  
18  
19  
20  
21  
22  
23  
24  
25  
26  
27  
28  
29  
30  
31  
32  
33  
34  
35  
36  
37  
38  
39  
40  
41  
42  
43  
44  
45  
46  
47  
48  
49  
50  
51  
52  
53  
54  
55  
56  
57  
58  
59  
60

For peer review only

## Figure Legends

**Fig. 1** Age-adjusted proportions of participants with hazardous alcohol consumption stratified by gender and a) educational attainment and b) occupational level.

Footnote: Trends were obtained using locally weighted scatterplot smoothing. Each shaded period represents one of the periods with different alcohol control laws

**Fig. 2** Absolute (SII) and relative (RII) inequalities in hazardous alcohol consumption for men (red) and women (blue) for a) educational attainment and b) occupational level.

Footnote: Estimates and 95% confidence intervals are presented as well as the level of significance. Wald test p values comparing indexes between groups are presented when  $<0.05$ .  $p < *0.05$ ,  $**0.01$  and  $***0.001$

**Supplementary fig. 1** Age-adjusted mean daily alcohol consumption alcohol consumption (g/day) stratified by gender and a) educational attainment and b) occupational level.

Footnote: Trends were obtained using locally weighted scatterplot smoothing. Each shaded period represents one of the periods with different alcohol control laws

**Supplementary fig. 2** Evolution of age-adjusted mean alcohol consumption and percentage of drinkers with hazardous alcohol consumption from 1993 to 2014 for men (red) and women (blue).

Footnote: Trends were obtained using locally weighted scatterplot smoothing. Each shaded period represents one of the periods with different alcohol control laws

**Supplementary fig. 3** Absolute (SII) inequalities in total daily alcohol consumption for men (red) and women (blue) for a) educational attainment and b) occupational level.

Footnote: Estimates and 95% confidence intervals are presented as well as the level of significance. Wald test p values comparing indexes were all  $p > 0.05$ .  $p < *0.05$ ,  $**0.01$  and  $***0.001$

**Table 1 – Participants’ characteristics according to educational attainment and gender (1993-2014, Bus Santé study, State of Geneva, Switzerland)**

|                                                     | Overall       | Men               |                     |                    |         | Women             |                     |                    |         |
|-----------------------------------------------------|---------------|-------------------|---------------------|--------------------|---------|-------------------|---------------------|--------------------|---------|
|                                                     |               | Primary education | Secondary Education | Tertiary education | p-value | Primary education | Secondary Education | Tertiary education | p-value |
| <b>N (%)</b>                                        | 16725 (100%)  | 1257 (14.7%)      | 4119 (48.2%)        | 3173 (37.1%)       |         | 1750 (21.4%)      | 3414 (41.8%)        | 3012 (36.8%)       |         |
| <b>age, mean ± SD</b>                               | 52.1 ± 10.6   | 52.8 ± 10.9       | 52.8 ± 10.7         | 51.0 ± 10.6        | <0.001  | 54.6 ± 10.6       | 52.9 ± 10.4         | 49.8 ± 10.1        | <0.001  |
| <b>Swiss nationality</b>                            |               |                   |                     |                    | <0.001  |                   |                     |                    | <0.001  |
| No                                                  | 4704 (28.1%)  | 690 (54.9%)       | 964 (23.4%)         | 1054 (33.2%)       |         | 561 (32.1%)       | 568 (16.6%)         | 867 (28.8%)        |         |
| Yes                                                 | 12013 (71.9%) | 567 (45.1%)       | 3152 (76.6%)        | 2116 (66.8%)       |         | 1189 (67.9%)      | 2846 (83.4%)        | 2143 (71.2%)       |         |
| <b>Total alcohol consumption (g/day), mean ± SD</b> | 15.9 ± 18.9   | 26.3 ± 24.7       | 22.3 ± 23.2         | 17.8 ± 18.1        | <0.001  | 10.7 ± 13.3       | 10.0 ± 12.7         | 10.2 ± 12.7        | 0.22    |
| <b>Hazardous alcohol consumption</b>                |               |                   |                     |                    | <0.001  |                   |                     |                    | 0.62    |
| No                                                  | 13676 (81.8%) | 840 (66.8%)       | 3089 (75.0%)        | 2641 (83.2%)       |         | 1510 (86.3%)      | 2979 (87.3%)        | 2617 (86.9%)       |         |
| Yes                                                 | 3049 (18.2%)  | 417 (33.2%)       | 1030 (25.0%)        | 532 (16.8%)        |         | 240 (13.7%)       | 435 (12.7%)         | 395 (13.1%)        |         |
| <b>Smoking status</b>                               |               |                   |                     |                    | <0.001  |                   |                     |                    | <0.001  |
| Never smoker                                        | 6812 (42.5%)  | 379 (30.2%)       | 1356 (33.0%)        | 1403 (44.3%)       |         | 819 (53.1%)       | 1441 (46.2%)        | 1414 (50.1%)       |         |
| Current smoker                                      | 3829 (23.9%)  | 382 (30.4%)       | 1154 (28.0%)        | 625 (19.7%)        |         | 355 (23.0%)       | 794 (25.4%)         | 519 (18.4%)        |         |
| Ex-smoker                                           | 5385 (33.6%)  | 496 (39.5%)       | 1605 (39.0%)        | 1140 (36.0%)       |         | 368 (23.9%)       | 886 (28.4%)         | 890 (31.5%)        |         |
| <b>Law package period</b>                           |               |                   |                     |                    | <0.001  |                   |                     |                    | <0.001  |
| Period 1 (before 20 Oct 2000)                       | 7187 (43.0%)  | 587 (46.7%)       | 1914 (46.5%)        | 1120 (35.3%)       |         | 1022 (58.4%)      | 1429 (41.9%)        | 1115 (37.0%)       |         |
| Period 2 (20 Oct 2000 to 1 Feb 2004)                | 3550 (21.2%)  | 269 (21.4%)       | 905 (22.0%)         | 632 (19.9%)        |         | 372 (21.3%)       | 707 (20.7%)         | 665 (22.1%)        |         |
| Period 3 (2 Feb 2004 to 31 Oct 2009)                | 2467 (14.8%)  | 178 (14.2%)       | 571 (13.9%)         | 535 (16.9%)        |         | 186 (10.6%)       | 501 (14.7%)         | 496 (16.5%)        |         |
| Period 4 (after 31 Oct 2009)                        | 3521 (21.1%)  | 223 (17.7%)       | 729 (17.7%)         | 886 (27.9%)        |         | 170 (9.7%)        | 777 (22.8%)         | 736 (24.4%)        |         |

**Table 2 – Prevalence ratio, RII and SII of educational attainment and occupational level as determinants of hazardous alcohol consumption.** Adjusted for age, nationality, smoking status and survey date.

|                               | Men              |         | Women               |         |
|-------------------------------|------------------|---------|---------------------|---------|
|                               | Estimate (95%CI) | p value | Estimate (95%CI)    | p value |
| <b>Educational Attainment</b> |                  |         |                     |         |
| Prevalence ratio:             |                  |         |                     |         |
| primary vs tertiary           | 1.58 [1.39;1.80] | p<0.001 | 0.84 [0.70;1.00]    | 0.048   |
| secondary vs tertiary         | 1.32 [1.18;1.47] | p<0.001 | 0.86 [0.74;0.99]    | 0.035   |
| RII (least to most educated)  | 1.87 [1.57;2.22] | p<0.001 | 0.76 [0.60;0.97]    | 0.026   |
| SII (least to most educated)  | 0.14 [0.11;0.17] | p<0.001 | -0.04 [-0.07;-0.01] | 0.008   |
| <b>Occupational level</b>     |                  |         |                     |         |
| Prevalence ratio:             |                  |         |                     |         |
| low vs high                   | 1.4 [1.24;1.59]  | p<0.001 | 1.09 [0.81;1.45]    | 0.58    |
| medium vs high                | 1.07 [0.93;1.24] | 0.31    | 0.83 [0.70;1.00]    | 0.053   |
| RII (low to high)             | 1.68 [1.38;2.06] | p<0.001 | 0.86 [0.62;1.20]    | 0.38    |
| SII (low to high)             | 0.11 [0.07;0.15] | p<0.001 | -0.02 [-0.05;0.02]  | 0.30    |

CI (confidence interval)

All

Men

Women

a)

% with hazardous alcohol consumption



Education  
 Primary Secondary Tertiary

b)

% with hazardous alcohol consumption



Occupational level  
 Low Medium High

a)

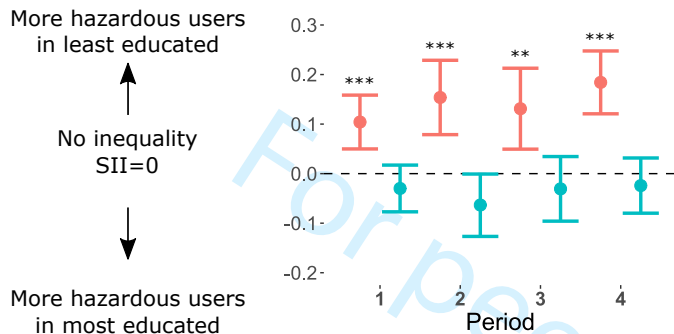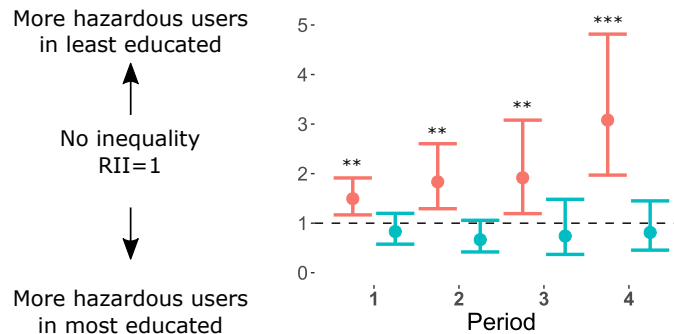

b)

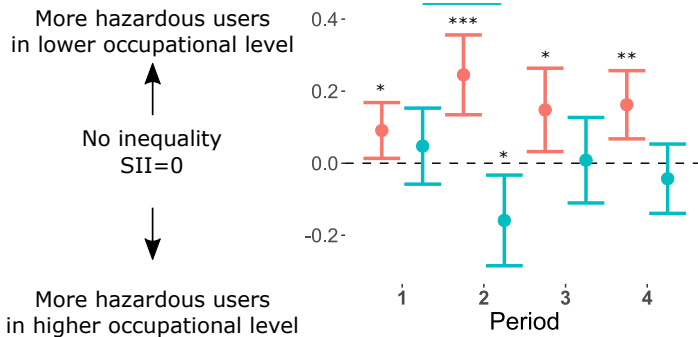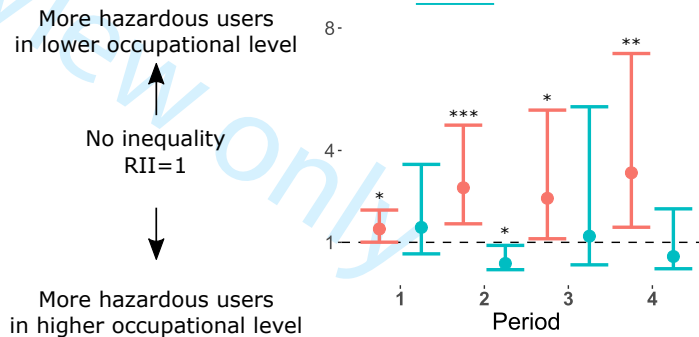

Gender

Men Women



All

Men

Women

a)

2  
3  
4  
5  
6  
7  
8  
9  
10  
11  
12  
13  
14  
15  
16  
17  
18  
19

Mean alcohol consumption (g/day)

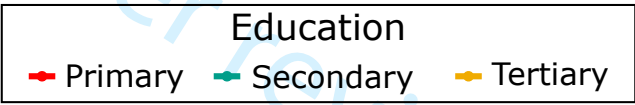

b)

20  
21  
22  
23  
24  
25  
26  
27  
28  
29  
30  
31  
32  
33  
34  
35  
36  
37  
38  
39  
40

Mean alcohol consumption (g/day)

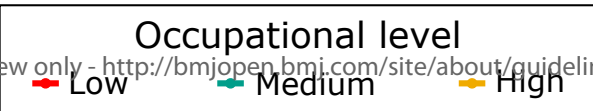

a)

Mean alcohol  
consumption  
(g/day)



b)

%  
with hazardous  
alcohol  
consumption



Gender

Men Women

a)

1  
2  
3  
4  
5  
6  
7  
8  
9  
10  
11  
12  
13  
14  
15  
16  
17  
18  
19  
20  
21  
22  
23  
24  
25  
26  
27  
28  
29  
30  
31  
32

More consumption  
in least educated

No inequality  
SII=0 g/day

More consumption  
in most educated

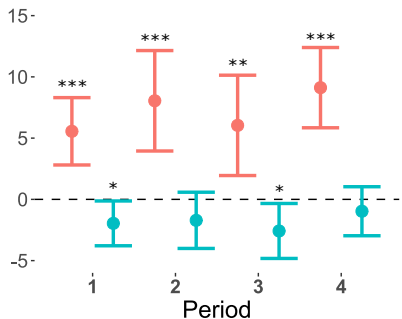

b)

More consumption  
in lower occupation level

No inequality  
SII=0 g/day

More consumption  
in higher occupational level

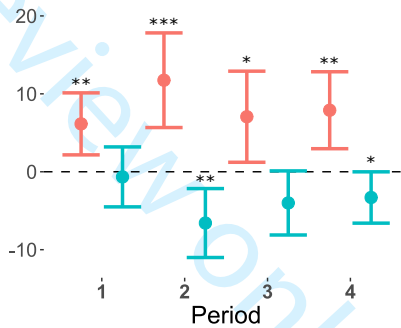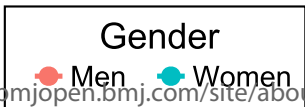

**Supplementary table 1 – Educational attainment as determinant of total alcohol consumption (linear regression coefficients and SII) and hazardous consumption (prevalence ratios, RII and SII). Analysis adjusted for occupational level (including retired, unemployed and housewife/househusband)**

|                                 | Men                 |         |                     |         | Women               |         |                     |         |
|---------------------------------|---------------------|---------|---------------------|---------|---------------------|---------|---------------------|---------|
|                                 | Adjusted*           |         | +Occupational level |         | Adjusted*           |         | +Occupational level |         |
|                                 | Estimate<br>(95%CI) | p value |
| <b>Consumption</b>              |                     |         |                     |         |                     |         |                     |         |
| Regression coefficient          |                     |         |                     |         |                     |         |                     |         |
| primary vs tertiary education   | 5.48 [4.07;6.89]    | p<0.001 | 4.58 [3.06;6.1]     | p<0.001 | -1.13 [-1.91;-0.34] | 0.005   | -1.08 [-1.92;-0.24] | 0.012   |
| secondary vs tertiary education | 2.78 [1.78;3.77]    | p<0.001 | 2.17 [1.08;3.26]    | p<0.001 | -1.25 [-1.88;-0.62] | p<0.001 | -1.12 [-1.8;-0.45]  | 0.001   |
| SII (least vs most educated)    | 7.10 [5.37;8.83]    | p<0.001 | 5.96 [4;7.91]       | p<0.001 | -1.90 [-2.97;-0.83] | p<0.001 | -1.80 [-2.98;-0.61] | 0.003   |
| <b>Hazardous consumption</b>    |                     |         |                     |         |                     |         |                     |         |
| Prevalence ratio:               |                     |         |                     |         |                     |         |                     |         |
| primary vs tertiary             | 1.58 [1.39;1.80]    | p<0.001 | 1.48 [1.28;1.7]     | p<0.001 | 0.84 [0.70;1.00]    | 0.048   | 0.81 [0.67;0.97]    | 0.023   |
| secondary vs tertiary           | 1.32 [1.18;1.47]    | p<0.001 | 1.26 [1.12;1.41]    | p<0.001 | 0.86 [0.74;0.99]    | 0.035   | 0.84 [0.72;0.98]    | 0.028   |
| RII (least to most educated)    | 1.87 [1.57;2.22]    | p<0.001 | 1.71 [1.41;2.08]    | p<0.001 | 0.76 [0.60;0.97]    | 0.026   | 0.72 [0.55;0.94]    | 0.015   |
| SII (least to most educated)    | 0.14 [0.11;0.17]    | p<0.001 | 0.12 [0.08;0.16]    | p<0.001 | -0.04 [-0.07;-0.01] | 0.008   | -0.05 [-0.08;-0.01] | 0.004   |

\*adjusted for age, nationality, smoking status and survey date

**Supplementary table 2 – Occupational level as determinant of total alcohol consumption (linear regression coefficients and SII) and hazardous consumption (prevalence ratios, RII and SII). Analysis adjusted for educational attainment.**

|                              | Men                 |         |                         |         | Women               |         |                         |         |
|------------------------------|---------------------|---------|-------------------------|---------|---------------------|---------|-------------------------|---------|
|                              | Adjusted*           |         | +Educational attainment |         | Adjusted*           |         | +Educational attainment |         |
|                              | Estimate<br>(95%CI) | p value | Estimate<br>(95%CI)     | p value | Estimate<br>(95%CI) | p value | Estimate<br>(95%CI)     | p value |
| <b>Consumption</b>           |                     |         |                         |         |                     |         |                         |         |
| Regression coefficient       |                     |         |                         |         |                     |         |                         |         |
| low vs high                  | 4.33 [3.11;5.55]    | p<0.001 | 2.52 [1.13;3.91]        | p<0.001 | -0.65 [-1.79;0.48]  | 0.26    | 0.07 [-1.17;1.31]       | 0.91    |
| medium vs high               | 0.16 [-1.10;1.43]   | 0.8     | -0.60 [-1.92;0.71]      | 0.37    | -1.34 [-2.01;-0.67] | p<0.001 | -0.86 [-1.59;-0.13]     | 0.02    |
| SII (low to high)            | 6.02 [4.09;7.94]    | p<0.001 | 4.06 [1.16;6.95]        | p<0.001 | -1.98 [-3.2;-0.76]  | 0.002   | -1.58 [-3.87;0.71]      | 0.18    |
| <b>Hazardous consumption</b> |                     |         |                         |         |                     |         |                         |         |
| Prevalence ratio:            |                     |         |                         |         |                     |         |                         |         |
| low vs high                  | 1.4 [1.24;1.59]     | p<0.001 | 1.18 [1.03;1.36]        | 0.02    | 1.09 [0.81;1.45]    | 0.58    | 1.29 [0.94;1.78]        | 0.12    |
| medium vs high               | 1.07 [0.93;1.24]    | 0.31    | 0.99 [0.86;1.15]        | .89     | 0.83 [0.70;1.00]    | 0.053   | 0.93 [0.76;1.14]        | 0.48    |
| RII (low to high)            | 1.68 [1.38;2.06]    | p<0.001 | 1.37 [1.01;1.85]        | 0.04    | 0.86 [0.62;1.20]    | 0.38    | 1.16 [0.62;2.17]        | 0.65    |
| SII (low to high)            | 0.11 [0.07;0.15]    | p<0.001 | 0.07 [0.02;0.13]        | 0.01    | -0.02 [-0.05;0.02]  | 0.30    | 0.02 [-0.05;0.08]       | 0.56    |

\*adjusted for age, nationality, smoking status and survey date

**Supplementary table 3 – Time-series analyses of total and hazardous alcohol consumption by gender. Overall and stratified by educational attainment or occupational level.**

|                                | All                 |         | Primary             |         | Secondary           |         | Tertiary            |         |
|--------------------------------|---------------------|---------|---------------------|---------|---------------------|---------|---------------------|---------|
|                                | beta [95% CI]       | P value |
| <b>Educational attainment*</b> |                     |         |                     |         |                     |         |                     |         |
| Men                            |                     |         |                     |         |                     |         |                     |         |
| Alcohol consumption            | -0.35 [-0.42;-0.27] | <0.001  | -0.12 [-0.35;0.11]  | 0.29    | -0.42 [-0.53;-0.30] | <0.001  | -0.37 [-0.47;-0.28] | <0.001  |
| Hazardous consumption          | -0.04 [-0.04;-0.03] | <0.001  | 0.00 [-0.02;0.02]   | 0.93    | -0.04 [-0.06;-0.03] | <0.001  | -0.05 [-0.07;-0.03] | <0.001  |
| Women                          |                     |         |                     |         |                     |         |                     |         |
| Alcohol consumption            | -0.20 [-0.25;-0.15] | <0.001  | -0.27 [-0.4;-0.13]  | <0.001  | -0.15 [-0.22;-0.07] | <0.001  | -0.23 [-0.31;-0.15] | <0.001  |
| Hazardous consumption          | -0.04 [-0.05;-0.02] | <0.001  | -0.05 [-0.08;-0.02] | 0.002   | -0.03 [-0.05;-0.01] | 0.006   | -0.04 [-0.06;-0.02] | <0.001  |
| <b>Occupational level**</b>    |                     |         |                     |         |                     |         |                     |         |
| Men                            |                     |         |                     |         |                     |         |                     |         |
| Alcohol consumption            | -0.40 [-0.48;-0.31] | <0.001  | -0.44 [-0.63;-0.25] | <0.001  | -0.38 [-0.57;-0.20] | <0.001  | -0.39 [-0.49;-0.28] | <0.001  |
| Hazardous consumption          | -0.05 [-0.06;-0.04] | <0.001  | -0.04 [-0.06;-0.02] | <0.001  | -0.04 [-0.07;-0.02] | <0.001  | -0.06 [-0.07;-0.04] | <0.001  |
| Women                          |                     |         |                     |         |                     |         |                     |         |
| Alcohol consumption            | -0.21 [-0.27;-0.15] | <0.001  | -0.38 [-0.57;-0.19] | <0.001  | -0.21 [-0.29;-0.13] | <0.001  | -0.18 [-0.26;-0.09] | <0.001  |
| Hazardous consumption          | -0.05 [-0.07;-0.03] | <0.001  | -0.08 [-0.14;-0.03] | 0.003   | -0.05 [-0.08;-0.03] | <0.001  | -0.04 [-0.07;-0.01] | 0.002   |

Note: all analyses adjusted for age, nationality and smoking status. \*Educational attainment analysis adjusted for occupational level (including retire, unemployed and housewives/househusbands), \*\* occupational analysis adjusted for educational attainment

1  
2  
3  
4  
5  
6  
7  
8  
9  
10  
11  
12  
13  
14  
15  
16  
17  
18  
19  
20  
21  
22  
23  
24  
25  
26  
27  
28  
29  
30  
31  
32  
33  
34  
35  
36  
37  
38  
39  
40  
41  
42  
43  
44  
45  
46

**Supplementary table 4 – Assessment of RII and SII differences across time using statistical interaction between SES indicators (educational attainment and occupational level) and legislative period. Interaction terms with 95% confidence intervals and p values are presented. Analysis stratified by gender and Period 1 was used as reference**

|                               | Men                     |                        |                        | Women                      |                          |                         |
|-------------------------------|-------------------------|------------------------|------------------------|----------------------------|--------------------------|-------------------------|
|                               | Period 2                | Period 3               | Period 4               | Period 2                   | Period 3                 | Period 4                |
| <b>Educational attainment</b> |                         |                        |                        |                            |                          |                         |
| RII hazardous consumption     | 1.3 (0.8;.02), p=0.25   | 1.4 (0.8;2.3), p=0.26  | 2.2 (1.3;3.6), p=0.002 | 1.3 (0.9;1.9), p=0.13      | 1.0 (0.5;1.7), p=0.90    | 1.2 (0.6;2.4), p=0.61   |
| SII hazardous consumption     | 0.1 (0.0;0.1), p=0.18   | 0.0 (-0.1;0.1), p=0.61 | 0.1 (0.0;0.2), p=0.12  | 0.0 (0.0;0.1), p=0.12      | 0.0 (-0.1;0.1), p=0.94   | 0.0 (-0.1;0.1), p=0.57  |
| SII total consumption         | 3.1 (-1.4;7.6), p=0.18  | 0.5 (-4.6;5.6), p=0.86 | 3.2 (-1.4;7.7), p=0.17 | 0.6 (-2.0;3.3), p=0.64     | -0.5 (-3.6;2.6), p=0.76  | 0.4 (-2.4;3.1), p=0.80  |
| <b>Occupational level</b>     |                         |                        |                        |                            |                          |                         |
| RII hazardous consumption     | 2.3 (1.2;4.3), p=0.012  | 1.9 (0.8;4.5), p=0.13  | 2.6 (1.1;6.2), p=0.02  | 0.2 (0.1;0.9), p=0.035     | 0.6 (0.1;3.5), p=0.60    | 0.3 (0.1;1.7), p=0.20   |
| SII hazardous consumption     | 0.2 (0.1;0.3), p=0.003  | 0.1 (-0.1;0.2), p=0.35 | 0.1 (-0.1;0.2), p=0.24 | -0.2 (-0.3;0.0), p=0.01    | -0.1 (-0.2;0.1), p=0.46  | -0.1 (-0.2;0.0), p=0.18 |
| SII total consumption         | 6.8 (0.3;13.3), p=0.042 | 2.0 (-5.5;9.5), p=0.60 | 2.3 (-4.7;9.2), p=0.52 | -6.1 (-11.5;-0.8), p=0.025 | -4.5 (-10.3;1.4), p=0.13 | -3.4 (-8.7;1.9), p=0.21 |

Supplementary table 5 – Participants' characteristics according to occupational level and gender (1993-2014, Bus Santé study)

|                                                     | Overall      | Men                    |                           |                         |         | Women                  |                           |                         |         |
|-----------------------------------------------------|--------------|------------------------|---------------------------|-------------------------|---------|------------------------|---------------------------|-------------------------|---------|
|                                                     |              | Low occupational level | Medium occupational level | High occupational level | p-value | Low occupational level | Medium occupational level | High occupational level | p-value |
| <b>N (%)</b>                                        | 11659 (100%) | 1696 (25.7%)           | 1441 (21.9%)              | 3457 (52.4%)            |         | 502 (9.9%)             | 2441 (48.2%)              | 2122 (41.9%)            |         |
| <b>age, mean ± SD</b>                               | 48.5 ± 8.4   | 48.3 ± 8.3             | 47.8 ± 8.3                | 49.1 ± 8.8              | <0.001  | 48.2 ± 8.6             | 48.6 ± 7.9                | 48.0 ± 8.1              | 0.037   |
| <b>Swiss nationality</b>                            |              |                        |                           |                         | <0.001  |                        |                           |                         | <0.001  |
| No                                                  | 3396 (29.1%) | 791 (46.7%)            | 432 (30.0%)               | 920 (26.6%)             |         | 253 (50.4%)            | 547 (22.4%)               | 453 (21.4%)             |         |
| Yes                                                 | 8257 (70.9%) | 904 (53.3%)            | 1009 (70.0%)              | 2534 (73.4%)            |         | 249 (49.6%)            | 1893 (77.6%)              | 1668 (78.6%)            |         |
| <b>Total alcohol consumption (g/day), mean ± SD</b> | 15.5 ± 18.6  | 24.3 ± 25.2            | 19.3 ± 21.5               | 18.7 ± 18.9             | <0.001  | 9.3 ± 12.0             | 9.1 ± 11.1                | 9.8 ± 12.1              | 0.12    |
| <b>Hazardous alcohol consumption</b>                |              |                        |                           |                         | <0.001  |                        |                           |                         | 0.57    |
| No                                                  | 9701 (83.2%) | 1222 (72.1%)           | 1153 (80.0%)              | 2837 (82.1%)            |         | 439 (87.5%)            | 2173 (89.0%)              | 1877 (88.5%)            |         |
| Yes                                                 | 1958 (16.8%) | 474 (27.9%)            | 288 (20.0%)               | 620 (17.9%)             |         | 63 (12.5%)             | 268 (11.0%)               | 245 (11.5%)             |         |
| <b>Smoking status</b>                               |              |                        |                           |                         | <0.001  |                        |                           |                         | <0.001  |
| Never smoker                                        | 4663 (41.4%) | 542 (32.0%)            | 524 (36.4%)               | 1439 (41.7%)            |         | 242 (52.4%)            | 964 (43.3%)               | 952 (48.0%)             |         |
| Current smoker                                      | 2865 (25.4%) | 540 (31.8%)            | 402 (28.0%)               | 768 (22.2%)             |         | 116 (25.1%)            | 617 (27.7%)               | 422 (21.3%)             |         |
| Ex-smoker                                           | 3732 (33.1%) | 614 (36.2%)            | 512 (35.6%)               | 1247 (36.1%)            |         | 104 (22.5%)            | 645 (29.0%)               | 610 (30.7%)             |         |
| <b>Law package period</b>                           |              |                        |                           |                         | 0.095   |                        |                           |                         | <0.001  |
| Period 1<br>(before 20 Oct 2000)                    | 4996 (42.9%) | 715 (42.2%)            | 678 (47.1%)               | 1476 (42.7%)            |         | 203 (40.4%)            | 1080 (44.2%)              | 844 (39.8%)             |         |
| Period 2<br>(20 Oct 2000 to 1 Feb 2004)             | 2498 (21.4%) | 369 (21.8%)            | 290 (20.1%)               | 736 (21.3%)             |         | 116 (23.1%)            | 548 (22.4%)               | 439 (20.7%)             |         |
| Period 3<br>(2 Feb 2004 to 31 Oct 2009)             | 1752 (15.0%) | 270 (15.9%)            | 197 (13.7%)               | 520 (15.0%)             |         | 65 (12.9%)             | 349 (14.3%)               | 351 (16.5%)             |         |
| Period 4<br>(after 31 Oct 2009)                     | 2413 (20.7%) | 342 (20.2%)            | 276 (19.2%)               | 725 (21.0%)             |         | 118 (23.5%)            | 464 (19.0%)               | 488 (23.0%)             |         |



**Supplementary table 6 – Time-series analyses of total and hazardous consumption by gender. Overall and stratified by educational attainment or occupational level**

|                               | Educational attainment |         |                     |         |                     |         |                     |         |
|-------------------------------|------------------------|---------|---------------------|---------|---------------------|---------|---------------------|---------|
|                               | All                    |         | Primary             |         | Secondary           |         | Tertiary            |         |
|                               | beta [95% CI]          | P value | beta [95% CI]       | P value | beta [95% CI]       | P value | beta [95% CI]       | P value |
| <b>Educational attainment</b> |                        |         |                     |         |                     |         |                     |         |
| Men                           |                        |         |                     |         |                     |         |                     |         |
| Alcohol consumption           | -0.34 [-0.41;-0.26]    | <0.001  | -0.10 [-0.32;0.13]  | 0.40    | -0.41 [-0.53;-0.30] | <0.001  | -0.36 [-0.46;-0.27] | <0.001  |
| Hazardous consumption         | -0.04 [-0.04;-0.03]    | <0.001  | 0.00 [-0.02;0.02]   | 0.75    | -0.04 [-0.06;-0.03] | <0.001  | -0.05 [-0.06;-0.03] | <0.001  |
| Women                         |                        |         |                     |         |                     |         |                     |         |
| Alcohol consumption           | -0.20 [-0.25;-0.15]    | <0.001  | -0.24 [-0.37;-0.10] | <0.001  | -0.16 [-0.23;-0.08] | <0.001  | -0.23 [-0.31;-0.16] | <0.001  |
| Hazardous consumption         | -0.04 [-0.05;-0.03]    | <0.001  | -0.04 [-0.07;-0.01] | 0.01    | -0.03 [-0.05;-0.01] | 0.002   | -0.04 [-0.06;-0.02] | <0.001  |
| <b>Occupational level</b>     |                        |         |                     |         |                     |         |                     |         |
| Men                           |                        |         |                     |         |                     |         |                     |         |
| Alcohol consumption           | -0.43 [-0.52;-0.35]    | <0.001  | -0.44 [-0.63;-0.25] | <0.001  | -0.42 [-0.60;-0.24] | <0.001  | -0.44 [-0.63;-0.25] | <0.001  |
| Hazardous consumption         | -0.05 [-0.06;-0.04]    | <0.001  | -0.04 [-0.06;-0.02] | <0.001  | -0.05 [-0.07;-0.03] | <0.001  | -0.06 [-0.08;-0.05] | <0.001  |
| Women                         |                        |         |                     |         |                     |         |                     |         |
| Alcohol consumption           | -0.20 [-0.26;-0.15]    | <0.001  | -0.39 [-0.57;-0.20] | <0.001  | -0.20 [-0.27;-0.12] | <0.001  | -0.17 [-0.26;-0.09] | <0.001  |
| Hazardous consumption         | -0.05 [-0.06;-0.03]    | <0.001  | -0.08 [-0.14;-0.03] | 0.002   | -0.05 [-0.07;-0.02] | 0.001   | -0.04 [-0.06;-0.01] | 0.003   |

Note: CI (confidence interval), analyses were adjusted for age, nationality and smoking status.

**Supplementary table 7 – Linear regression coefficients and SII of educational attainment and occupational level as determinants of total alcohol consumption. Adjusted for age, nationality, smoking status and survey date.**

|                                 | Men                  |         | Women                |         |
|---------------------------------|----------------------|---------|----------------------|---------|
|                                 | Estimate<br>(95% CI) | p value | Estimate<br>(95% CI) | p value |
| <b>Educational attainment</b>   |                      |         |                      |         |
| Regression coefficient          |                      |         |                      |         |
| primary vs tertiary education   | 5.48 [4.07;6.89]     | p<0.001 | -1.13 [-1.91;-0.34]  | 0.005   |
| secondary vs tertiary education | 2.78 [1.78;3.77]     | p<0.001 | -1.25 [-1.88;-0.62]  | p<0.001 |
| SII (least to most educated)    | 7.10 [5.37;8.83]     | p<0.001 | -1.90 [-2.97;-0.83]  | p<0.001 |
| <b>Occupational Level</b>       |                      |         |                      |         |
| Regression coefficient          |                      |         |                      |         |
| low vs high                     | 4.33 [3.11;5.55]     | p<0.001 | -0.65 [-1.79;0.48]   | 0.26    |
| medium vs high                  | 0.16 [-1.10;1.43]    | 0.8     | -1.34 [-2.01;-0.67]  | p<0.001 |
| SII (low to high)               | 6.02 [4.09;7.94]     | p<0.001 | -1.98 [-3.20;-0.76]  | 0.002   |

CI (confidence interval)

**Supplementary table 8 – Absolute (SII) and relative measures (RII) of inequality for total and hazardous alcohol consumption using educational attainment or occupational level as SES indicator. Estimates are presented for each legislative period and by gender**

|                                   | Period | Educational level   |         | Occupational level  |         |
|-----------------------------------|--------|---------------------|---------|---------------------|---------|
|                                   |        | Estimate (95%CI)    | p value | Estimate (95%CI)    | p value |
| <b>Men</b>                        |        |                     |         |                     |         |
| SII alcohol consumption           | 1      | 5.56 [2.81;8.31]    | <0.001  | 6.15 [2.17;10.13]   | 0.002   |
|                                   | 2      | 8.05 [3.95;12.15]   | <0.001  | 11.75 [5.67;17.82]  | <0.001  |
|                                   | 3      | 6.04 [1.95;10.14]   | 0.004   | 7.06 [1.22;12.91]   | 0.018   |
|                                   | 4      | 9.12 [5.85;12.40]   | <0.001  | 7.90 [2.96;12.83]   | 0.002   |
| RII hazardous alcohol consumption | 1      | 1.49 [1.17;1.91]    | 0.001   | 1.44 [1.00;2.05]    | 0.047   |
|                                   | 2      | 1.83 [1.29;2.60]    | 0.001   | 2.78 [1.61;4.83]    | <0.001  |
|                                   | 3      | 1.92 [1.19;3.08]    | 0.007   | 2.44 [1.12;5.32]    | 0.025   |
|                                   | 4      | 3.08 [1.97;4.82]    | <0.001  | 3.27 [1.49;7.17]    | 0.003   |
| SII hazardous alcohol consumption | 1      | 0.10 [0.05;0.16]    | <0.001  | 0.09 [0.01;0.17]    | 0.021   |
|                                   | 2      | 0.15 [0.08;0.23]    | <0.001  | 0.25 [0.13;0.36]    | <0.001  |
|                                   | 3      | 0.13 [0.05;0.21]    | 0.002   | 0.15 [0.03;0.26]    | 0.012   |
|                                   | 4      | 0.18 [0.12;0.25]    | <0.001  | 0.16 [0.07;0.26]    | 0.001   |
| <b>Women</b>                      |        |                     |         |                     |         |
| SII alcohol consumption           | 1      | -1.96 [-3.79;-0.13] | 0.036   | -0.66 [-4.51;3.19]  | 0.737   |
|                                   | 2      | -1.71 [-4.01;0.58]  | 0.144   | -6.58 [-11;-2.16]   | 0.004   |
|                                   | 3      | -2.58 [-4.82;-0.33] | 0.024   | -4.00 [-8.11;0.11]  | 0.057   |
|                                   | 4      | -0.97 [-2.97;1.03]  | 0.342   | -3.30 [-6.60;-0.01] | 0.049   |
| RII hazardous alcohol consumption | 1      | 0.83 [0.58;1.20]    | 0.321   | 1.49 [0.62;3.55]    | 0.37    |
|                                   | 2      | 0.67 [0.42;1.06]    | 0.085   | 0.31 [0.11;0.90]    | 0.031   |
|                                   | 3      | 0.74 [0.37;1.48]    | 0.395   | 1.20 [0.27;5.43]    | 0.812   |
|                                   | 4      | 0.81 [0.46;1.45]    | 0.483   | 0.54 [0.14;2.09]    | 0.371   |
| SII hazardous alcohol consumption | 1      | -0.03 [-0.08;0.02]  | 0.213   | 0.05 [-0.06;0.15]   | 0.378   |
|                                   | 2      | -0.06 [-0.13;0.00]  | 0.05    | -0.16 [-0.28;-0.03] | 0.013   |
|                                   | 3      | -0.03 [-0.10;0.03]  | 0.355   | 0.01 [-0.11;0.13]   | 0.89    |
|                                   | 4      | -0.02 [-0.08;0.03]  | 0.396   | -0.04 [-0.14;0.05]  | 0.381   |

STROBE Statement—Checklist of items that should be included in reports of *cross-sectional studies*

|                              | Item No | Recommendation                                                                                                                                                                                    | Page #          |
|------------------------------|---------|---------------------------------------------------------------------------------------------------------------------------------------------------------------------------------------------------|-----------------|
| <b>Title and abstract</b>    | 1       | (a) Indicate the study's design with a commonly used term in the title or the abstract                                                                                                            | 2- abstract     |
|                              |         | (b) Provide in the abstract an informative and balanced summary of what was done and what was found                                                                                               | 2-3             |
| <b>Introduction</b>          |         |                                                                                                                                                                                                   |                 |
| Background/rationale         | 2       | Explain the scientific background and rationale for the investigation being reported                                                                                                              | 4               |
| Objectives                   | 3       | State specific objectives, including any prespecified hypotheses                                                                                                                                  | 5               |
| <b>Methods</b>               |         |                                                                                                                                                                                                   |                 |
| Study design                 | 4       | Present key elements of study design early in the paper                                                                                                                                           | 5               |
| Setting                      | 5       | Describe the setting, locations, and relevant dates, including periods of recruitment, exposure, follow-up, and data collection                                                                   | 5-6             |
| Participants                 | 6       | (a) Give the eligibility criteria, and the sources and methods of selection of participants                                                                                                       | 6               |
| Variables                    | 7       | Clearly define all outcomes, exposures, predictors, potential confounders, and effect modifiers. Give diagnostic criteria, if applicable                                                          | 6-8             |
| Data sources/<br>measurement | 8*      | For each variable of interest, give sources of data and details of methods of assessment (measurement). Describe comparability of assessment methods if there is more than one group              | 6-8             |
| Bias                         | 9       | Describe any efforts to address potential sources of bias                                                                                                                                         | 6-9             |
| Study size                   | 10      | Explain how the study size was arrived at                                                                                                                                                         | 6-7             |
| Quantitative variables       | 11      | Explain how quantitative variables were handled in the analyses. If applicable, describe which groupings were chosen and why                                                                      | 7-8             |
| Statistical methods          | 12      | (a) Describe all statistical methods, including those used to control for confounding                                                                                                             | 8               |
|                              |         | (b) Describe any methods used to examine subgroups and interactions                                                                                                                               | 8-9             |
|                              |         | (c) Explain how missing data were addressed                                                                                                                                                       | 6               |
|                              |         | (d) If applicable, describe analytical methods taking account of sampling strategy                                                                                                                | N/A             |
|                              |         | (e) Describe any sensitivity analyses                                                                                                                                                             | 9-10            |
| <b>Results</b>               |         |                                                                                                                                                                                                   |                 |
| Participants                 | 13*     | (a) Report numbers of individuals at each stage of study—eg numbers potentially eligible, examined for eligibility, confirmed eligible, included in the study, completing follow-up, and analysed | 6,10            |
|                              |         | (b) Give reasons for non-participation at each stage                                                                                                                                              | 6               |
|                              |         | (c) Consider use of a flow diagram                                                                                                                                                                | N/A             |
| Descriptive data             | 14*     | (a) Give characteristics of study participants (eg demographic, clinical, social) and information on exposures and potential confounders                                                          | Table 1 & 10-11 |
|                              |         | (b) Indicate number of participants with missing data for each variable of interest                                                                                                               | Table 1         |
| Outcome data                 | 15*     | Report numbers of outcome events or summary measures                                                                                                                                              | Table 1         |
| Main results                 | 16      | (a) Give unadjusted estimates and, if applicable, confounder-adjusted estimates and their precision (eg, 95% confidence interval). Make clear                                                     | 11-12           |

|                          |    |                                                                                                                                                                            |                      |
|--------------------------|----|----------------------------------------------------------------------------------------------------------------------------------------------------------------------------|----------------------|
|                          |    | which confounders were adjusted for and why they were included                                                                                                             |                      |
|                          |    | (b) Report category boundaries when continuous variables were categorized                                                                                                  | N/A                  |
|                          |    | (c) If relevant, consider translating estimates of relative risk into absolute risk for a meaningful time period                                                           | N/A                  |
| Other analyses           | 17 | Report other analyses done—eg analyses of subgroups and interactions, and sensitivity analyses                                                                             | 11-12 and Sup tables |
| <b>Discussion</b>        |    |                                                                                                                                                                            |                      |
| Key results              | 18 | Summarise key results with reference to study objectives                                                                                                                   | 12                   |
| Limitations              | 19 | Discuss limitations of the study, taking into account sources of potential bias or imprecision. Discuss both direction and magnitude of any potential bias                 | 14                   |
| Interpretation           | 20 | Give a cautious overall interpretation of results considering objectives, limitations, multiplicity of analyses, results from similar studies, and other relevant evidence | 13-15                |
| Generalisability         | 21 | Discuss the generalisability (external validity) of the study results                                                                                                      | 15                   |
| <b>Other information</b> |    |                                                                                                                                                                            |                      |
| Funding                  | 22 | Give the source of funding and the role of the funders for the present study and, if applicable, for the original study on which the present article is based              | 16                   |

\*Give information separately for exposed and unexposed groups.

**Note:** An Explanation and Elaboration article discusses each checklist item and gives methodological background and published examples of transparent reporting. The STROBE checklist is best used in conjunction with this article (freely available on the Web sites of PLoS Medicine at <http://www.plosmedicine.org/>, Annals of Internal Medicine at <http://www.annals.org/>, and Epidemiology at <http://www.epidem.com/>). Information on the STROBE Initiative is available at [www.strobe-statement.org](http://www.strobe-statement.org).
