# Supplementary material for: Alcohol control policies and socioeconomic inequalities in hazardous alcohol consumption: a 22-year cross-sectional study in a Swiss urban population
Source: PubMed Central journal article supplement — BMJ Open. 2019 May 24;9(5):e028971. doi: 10.1136/bmjopen-2019-028971 (PMC6538024; doi:10.1136/bmjopen-2019-028971), 2019-05-24
Supplement: bmjopen-2019-028971supp003.pdf [file bmjopen-2019-028971supp003.pdf]

# Supplementary figure 2

a)

**Mean alcohol consumption (g/day)**

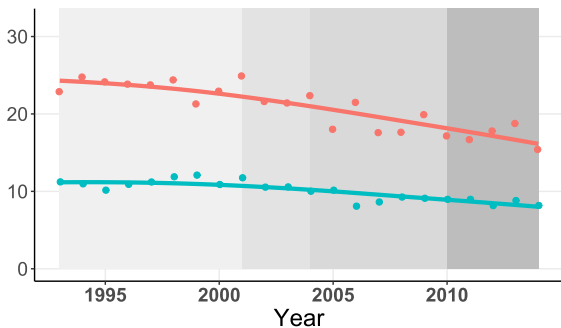

b)

**% with hazardous alcohol consumption**

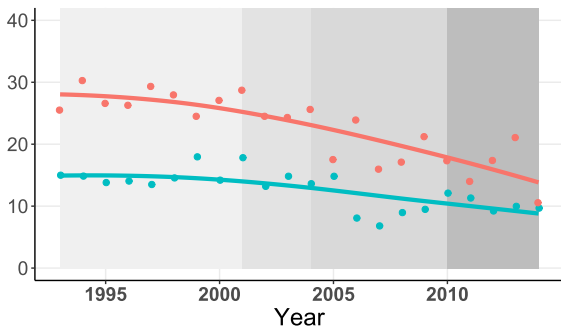

**Gender**

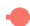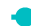

Men Women
