# Supplementary material for: Alcohol control policies and socioeconomic inequalities in hazardous alcohol consumption: a 22-year cross-sectional study in a Swiss urban population
Source: PubMed Central journal article supplement — BMJ Open. 2019 May 24;9(5):e028971. doi: 10.1136/bmjopen-2019-028971 (PMC6538024; doi:10.1136/bmjopen-2019-028971), 2019-05-24

# Supplementary figure 3

a)

More consumption  
in least educated

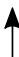

No inequality  
SII=0 g/day

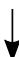

More consumption  
in most educated

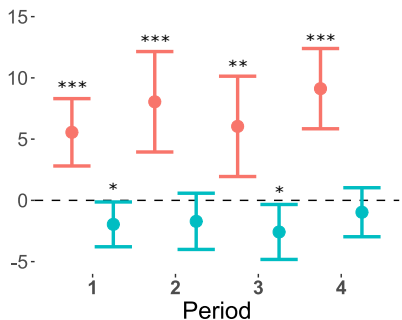

b)

More consumption  
in lower occupation level

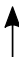

No inequality  
SII=0 g/day

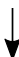

More consumption  
in higher occupational level

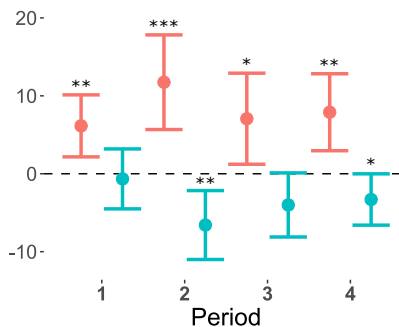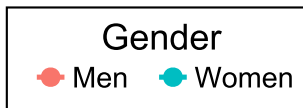

Supplement: bmjopen-2019-028971supp004.pdf [file bmjopen-2019-028971supp004.pdf]
