# Supplementary figures and images for: Alcohol control policies and socioeconomic inequalities in hazardous alcohol consumption: a 22-year cross-sectional study in a Swiss urban population
Source: PubMed Central journal article supplement — BMJ Open. 2019 May 24;9(5):e028971. doi: 10.1136/bmjopen-2019-028971 (PMC6538024; doi:10.1136/bmjopen-2019-028971), 2019-05-24

a)

All

Men

Women

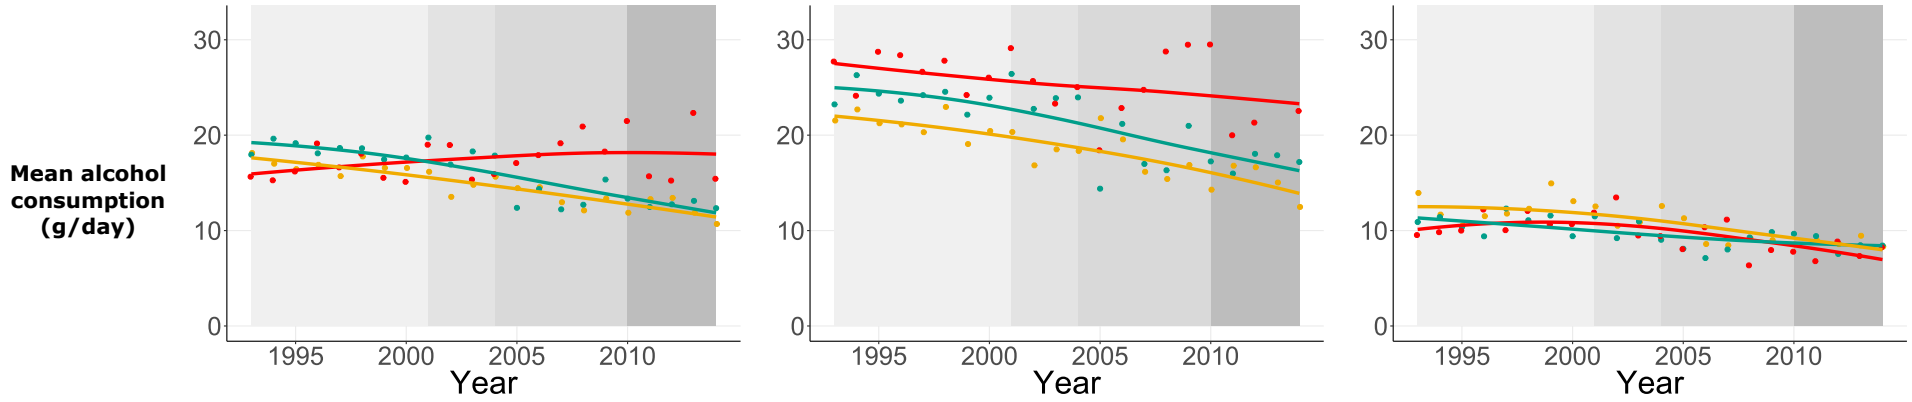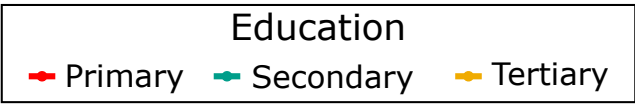

b)

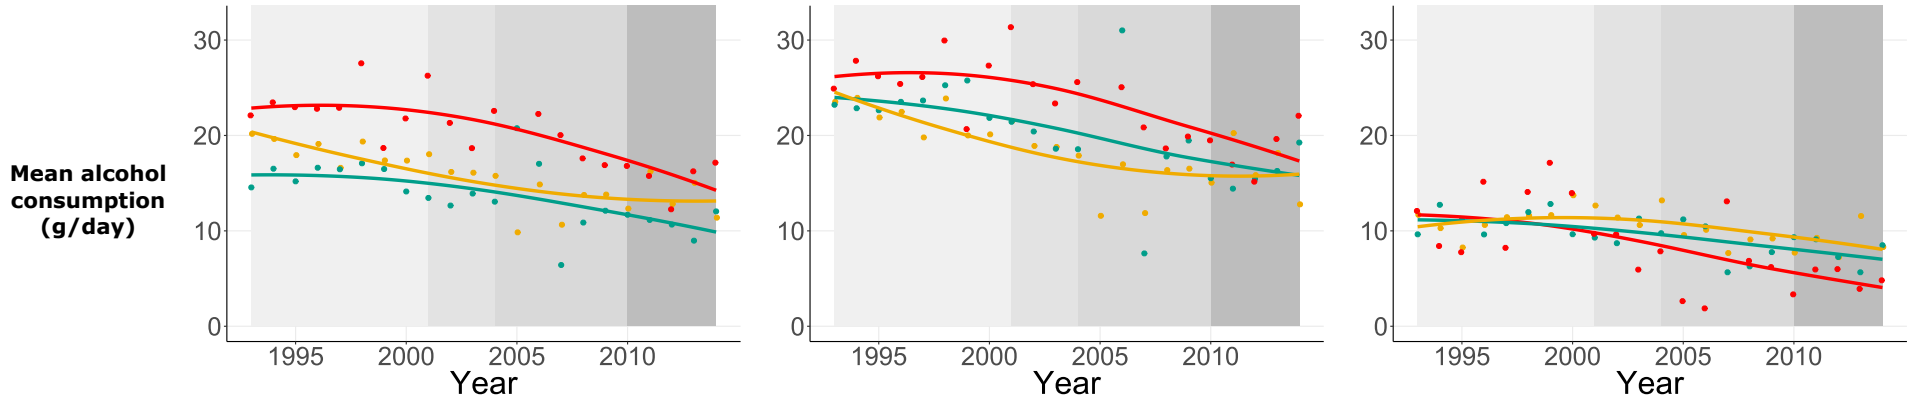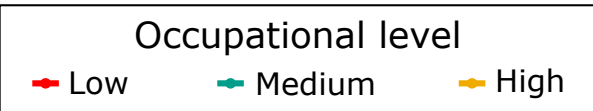

Supplement: bmjopen-2019-028971supp002.pdf [file bmjopen-2019-028971supp002.pdf]
